# Supplementary material for: Identification of miRNA–mRNA Pairs in the Alzheimer’s Disease Expression Profile and Explore the Effect of miR-26a-5p/PTGS2 on Amyloid-β Induced Neurotoxicity in Alzheimer’s Disease Cell Model
Source: Front Aging Neurosci. 2022 Jun 15;14:909222. doi: 10.3389/fnagi.2022.909222 (PMC9249435; doi:10.3389/fnagi.2022.909222)
Supplement: Supplementary Material 3 — AD related components in HUANGQIN from HERB database. AD, Alzheimer’s disease. [file Data_Sheet_3.xlsx]

## Sheet: sheet1
Ingredient id	Ingredient name	Ingredient alias
HBIN000280	11,13-Eicosadienoic acid, methyl ester	methyl (11E,13E)-icosa-11,13-dienoate; 11,13-eicosadienoic acid,methyl ester; Methyl (11E,13E)-11,13-icosadienoate; (11E,13E)-icosa-11,13-dienoic acid methyl ester
HBIN000328	1,1,6-trimethyl-2H-naphthalene	1,2-Dihydro-1,1,6-trimethylnaphthalene; EINECS 250-150-8; Naphthalene, 1,2-dihydro-1,1,6-trimethyl-; 30364-38-6; 1,1,6-Trimethyl-1,2-dihydronaphthalene
HBIN001070	1,3,5-trihydroxyxanthone	NA
HBIN001307	13-Tetradecenyl acetate	tetradec-13-enyl ethanoate; acetic acid tetradec-13-enyl ester; tetradec-13-enyl acetate; 13-Tetradecen-1-ol acetate
HBIN001481	1-(4-hydroxy-3-methoxyphenyl)-3,5-octane-diol	1-(4-hydroxy-3-methoxyphenyl)octane-3,5-diol; AC1NSWME
HBIN001867	1,6-dihydroxy-3,5,7-trimethoxyxanthone	MolPort-039-338-634; CTK1I3696; 65008-17-5; AKOS030562641; 1,6-DIHYDROXY-3,5,7-TRIMETHOXY-9H-XANTHEN-9-ONE; AC1NSURM; 9H-Xanthen-9-one, 1,6-dihydroxy-3,5,7-trimethoxy-; ZINC14649050; 1,6-Dihydroxy-3,5,7-trimethoxyxanthone; DTXSID40415710; AK594542; 3,8-dihydroxy-2,4,6-trimethoxyxanthone; 1,6-dihydroxy-3,5,7-trimethoxyxanthen-9-one
HBIN002102	1,8 cineole	Eucalyptol, tested according to Ph.Eur.; CCRIS 3727; CS-8146; 2-Oxa-1,3,3-trimethylbicyclo(2.2.2)octane; DSSTox_CID_616; CHEMBL485259; TR-017465; Eucalyptol, analytical standard; Eucalyptol, 99%; Cucalyptol; 1, 8- Cineole; 1.8-cineole; 1,8-Cineole; ZINC00967566; eucalytol; DivK1c_000333; I14-18994; Eucalyptole; 1,8-Epoxy-p-menthane; {2-Oxabicyclo[2.2.2]octane,} 1,3,3-trimethyl-; NCGC00091666-01; …
HBIN002119	1,8-dihydroxy-4-hydroxymethyl anthraquinone	NA
HBIN002972	1-phenyl-1,3-butanedion	KS-00000C21; CVBUKMMMRLOKQR-UHFFFAOYSA-N; X6797; benzoyl acetone; BG00601093; Benzoyl-aceton [German]; SBB040798; NSC4015; 1-phenyl-butane-1,3-dione; omega-ACETYLACETOPHENONE; DSSTox_RID_76337; NSC 4015; 2-Acetylacetophenone; 2-Propanone, benzoyl-; NSC-100655; acetyl acetophenone; KB-64903; Acetylbenzoylmethane; DSSTox_CID_1803; .alpha.-Acetylacetophenone; ST24038177; AC1Q5F12; STR01075; MCULE-55…
HBIN003295	(1S,4S)-7-isopropylidene-1,4-dimethyl-2,3,4,5,6,8-hexahydro-1H-azulene	(1S,4S)-1,4-dimethyl-7-propan-2-ylidene-2,3,4,5,6,8-hexahydro-1H-azulene
HBIN003405	20-Hexadecanoylingenol	20-hexadecanoylingenol
HBIN003669	2-(2,6-dihydroxyphenyl)-3,5,7-trihydroxy-chromone	2-(2,6-dihydroxyphenyl)-3,5,7-trihydroxy-4-chromenone; 2-(2,6-dihydroxyphenyl)-3,5,7-trihydroxy-chromen-4-one; 2-(2,6-dihydroxyphenyl)-3,5,7-trihydroxychromen-4-one; 3,5,7,2',6'-Pentahydroxy flavonol; 92519-95-4
HBIN003917	2',3',5,7-tetrahydroxyflavone	4H-1-Benzopyran-4-one, 2-(2,3-dihydroxyphenyl)-5,7-dihydroxy-; 5,7,2',3'-Tetrahydroxyflavone; 2-(2,3-dihydroxyphenyl)-5,7-dihydroxy-chromen-4-one; 2-(2,3-dihydroxyphenyl)-5,7-dihydroxy-chromone; 74805-70-2; 2-(2,3-dihydroxyphenyl)-5,7-dihydroxy-4-chromenone; 2-(2,3-dihydroxyphenyl)-5,7-dihydroxychromen-4-one
HBIN004112	2-(3-hydroxy-4-methoxyphenyl)-ethyl-1-o-α-l-rhamnosyl-(1→3)-β-d-(4-feruloyl)-glucoside	NA
HBIN004835	2,6,2',4'-tetrahydroxy-6’-methoxychalcone	NA
HBIN004836	2,6,2',4'-tetrahydroxy-6'-methoxychaleone	NA
HBIN005011	2',7-dihydroxy-4',5'-dimethoxyisoflavone	2',7-Dihydroxy-4',5'-dimethoxyisoflavone; 7-hydroxy-3-(2-hydroxy-4,5-dimethoxyphenyl)-4H-chromen-4-one; 7-hydroxy-3-(2-hydroxy-4,5-dimethoxyphenyl)chromen-4-one; CHEMBL430186; SCHEMBL17938790; AC1NSUMN
HBIN006535	(2R)-7-hydroxy-5-methoxy-2-phenylchroman-4-one	ZINC00338038; (2R)-7-hydroxy-5-methoxy-2-phenyl-4-chromanone; (2R)-7-hydroxy-5-methoxy-2-phenyl-chroman-4-one
HBIN006640	(2S,3R,4R,5R,6S)-2-[(2R,3R,4S,5R,6R)-3,5-dihydroxy-2-[2-(3-hydroxy-4-methoxy-phenyl)ethoxy]-6-methylol-tetrahydropyran-4-yl]oxy-6-methyl-tetrahydropyran-3,4,5-triol	(2S,3R,4R,5R,6S)-2-[(2R,3R,4S,5R,6R)-3,5-dihydroxy-2-[2-(3-hydroxy-4-methoxyphenyl)ethoxy]-6-(hydroxymethyl)oxan-4-yl]oxy-6-methyloxane-3,4,5-triol; (2S,3R,4R,5R,6S)-2-[(2R,3R,4S,5R,6R)-3,5-dihydroxy-2-[2-(3-hydroxy-4-methoxy-phenyl)ethoxy]-6-(hydroxymethyl)tetrahydropyran-4-yl]oxy-6-methyl-tetrahydropyran-3,4,5-triol; (2S,3R,4R,5R,6S)-2-[(2R,3R,4S,5R,6R)-3,5-dihydroxy-2-[2-(3-hydroxy-4-methoxy-p…
HBIN007273	3,4',5,7-tetrahydroxyflavone-3-l-rhamnoside	NA
HBIN007287	3,4',5-trihydroxy-7-methoxy-8-isopentenyl-flavone	NA
HBIN007380	3,4-dihydroxy-6,7,3',4'-tetramethoxyflavonol	AC1NSURD; 2-(3,4-dimethoxyphenyl)-6,7-dimethoxy-4H-chromene-3,4-diol
HBIN007563	3,5,7,2'6'-pentahydroxyflavanone	NA
HBIN007565	3,5,7,2',6'-pentahydroxy flavone	NA
HBIN007566	3,5,7,2',6'-pentahydroxy flavonol	NA
HBIN007807	3,7-dimethylnonane	3,7-dimethyl-nonane
HBIN007835	3,8-dimethylundecane	3,8-Dimethyl hendecane
HBIN007940	3α-dihydrocadambine	3alpha-dihydrocadambine
HBIN008022	3beta,15zeta,16-trihydroxy isopimaric acid	NA
HBIN009979	4,5,6-trihydroxy-aurone	SCHEMBL13090724; AC1NT14R; 4, 5, 6-trihydroxy-aurone; (2Z)-2-benzylidene-4,5,6-trihydroxy-1-benzofuran-3-one
HBIN010578	4'-hydroxywogonin	BG01592764; DTXSID80205713; AKOS028108779; SCHEMBL738981; CTK5A6274; 4'-Hydroxywogonin; LMPK12111363; 5,7-dihydroxy-2-(4-hydroxyphenyl)-8-methoxychromen-4-one; CHEMBL245712; W1620; MolPort-035-705-972; 4H-1-Benzopyran-4-one,5,7-dihydroxy-2-(4-hydroxyphenyl)-8-methoxy-; 5,7,4'-Trihydroxy-8-methoxyflavone; 4-Hydroxywogonin; AC1NT16L; 4H-1-Benzopyran-4-one, 5,7-dihydroxy-2-(4-hydroxyphenyl)-8-methox…
HBIN010975	5,2',5'-Trihydroxy-6,7,8-trimethoxyflavone	LMPK12111426; 5,2',5'-trihydroxy-6,7,8-trimethoxyflavone; 2-(2,5-dihydroxyphenyl)-3,5-dihydroxy-6,7,8-trimethoxy-chromone; 2-(2,5-dihydroxyphenyl)-3,5-dihydroxy-6,7,8-trimethoxy-chromen-4-one; 2-(2,5-dihydroxyphenyl)-3,5-dihydroxy-6,7,8-trimethoxychromen-4-one; 2-(2,5-dihydroxyphenyl)-3,5-dihydroxy-6,7,8-trimethoxy-4-chromenone
HBIN010976	5,2',6'-Trihydroxy-7,8-dimethoxyflavone	2-(2,6-Dihydroxyphenyl)-5-hydroxy-7,8-dimethoxy-4H-1-benzopyran-4-one; 5,2',6'-trihydroxy-7,8-dimethoxyflavone; AC1NT15F; 2-(2,6-dihydroxyphenyl)-5-hydroxy-7,8-dimethoxy-chromen-4-one; Viscidulin II; ZINC14644426; 2-(2,6-dihydroxyphenyl)-5-hydroxy-7,8-dimethoxy-4-chromenone; 2-(2,6-dihydroxyphenyl)-5-hydroxy-7,8-dimethoxy-chromone; LMPK12111309; SCHEMBL8814640; MolPort-039-338-851; 2-(2,6-dihydro…
HBIN010979	5,2'-Dihydroxy-6,7,8-trimethoxyflavone	86926-52-5; 4H-1-Benzopyran-4-one, 5-hydroxy-2-(2-hydroxyphenyl)-6,7,8-trimethoxy-; 5-hydroxy-2-(2-hydroxyphenyl)-6,7,8-trimethoxy-chromen-4-one; 5-hydroxy-2-(2-hydroxyphenyl)-6,7,8-trimethoxychromen-4-one; 5,2'-dihydroxy-6,7,8-trimethoxyflavone; 5-hydroxy-2-(2-hydroxyphenyl)-6,7,8-trimethoxy-chromone; 5-hydroxy-2-(2-hydroxyphenyl)-6,7,8-trimethoxy-4-chromenone
HBIN010983	5-(2-hydroxyethyl)-2-methoxyphenol	5-(2-hydroxyethyl)-2-methoxy-phenol
HBIN011083	5,6,3',4'-tetrahydroxy-7-methoxyflavone	NA
HBIN011091	5,6,7,3',4'-pentahydroxy-3-methoxyflavone	DTXSID70214394; 64190-88-1; 2-(3,4-dihydroxyphenyl)-5,6,7-trihydroxy-3-methoxychromen-4-one; Quercetagetin 3-methyl ether; 3',4',5,6,7-Pentahydroxy-3-methoxyflavone; 4H-1-Benzopyran-4-one, 2-(3,4-dihydroxyphenyl)-5,6,7-trihydroxy-3-methoxy-; CHEMBL478439; LMPK12112984; AC1NSZIK; BDBM50412299
HBIN011158	5,7,2',3'-tetrahydroxyflavone	5,7,2',3'-Tetrahydroxyflavone; 2-(2,3-Dihydroxyphenyl)-5,7-dihydroxy-4H-1-benzopyran-4-one; 4H-1-Benzopyran-4-one, 2-(2,3-dihydroxyphenyl)-5,7-dihydroxy-; 4H-1-Benzopyran-4-one,2-(2,3-dihydroxyphenyl)-5,7-dihydroxy-; AKOS030553571; 74805-70-2; LMPK12110137; SCHEMBL9148162; 2-(2,3-dihydroxyphenyl)-5,7-dihydroxy-4H-chromen-4-one; DTXSID60225777; CTK5E0539; AK583616; 2-(2,3-dihydroxyphenyl)-5,7-dihy…
HBIN011163	5,7,2,5-tetrahydroxy-8,6-dimethoxyflavone	NA
HBIN011164	5,7,2',5'-tetrahydroxy-8,6'-dimethoxy flavone	NA
HBIN011166	5,7,2',6'-Tetrahydroxyflavone	2-(2,6-dihydroxyphenyl)-5,7-dihydroxy-4H-chromen-4-one; SCHEMBL8158889; 2-(2,6-dihydroxyphenyl)-5,7-dihydroxy-4-chromenone; AK582765; AC1NT0WY; 2-(2,6-dihydroxyphenyl)-5,7-dihydroxy-chromone; 2-(2,6-dihydroxyphenyl)-5,7-dihydroxy-chromen-4-one; 4H-1-Benzopyran-4-one, 2-(2,6-dihydroxyphenyl)-5,7-dihydroxy-; AKOS030552865; CTK3E8863; 2-(2,6-Dihydroxyphenyl)-5,7-dihydroxy-4H-1-benzopyran-4-one; DTXS…
HBIN011168	5,7,2'-trihydroxy-6-methoxyflavone	5,7,2'-Trihydroxy-6-methoxyflavone; SCHEMBL6906640; 2',5,7-trihydroxy-6-methoxyflavone; AK583213; CHEMBL495721; DTXSID00415791; CHEBI:69541; LMPK12111080; 86926-51-4; 5,7-dihydroxy-2-(2-hydroxyphenyl)-6-methoxy-4H-chromen-4-one; AC1NT16I; CTK3C6229; 4H-1-Benzopyran-4-one, 5,7-dihydroxy-2-(2-hydroxyphenyl)-6-methoxy-; AKOS030553253; 5,7-dihydroxy-2-(2-hydroxyphenyl)-6-methoxychromen-4-one
HBIN011170	5,7,2'-trihydroxy-8,6'-dimethoxyflavone	SCHEMBL8814605; NP-016425; AC1NT15I; MCULE-7679878342; 5,7-dihydroxy-2-(2-hydroxy-6-methoxyphenyl)-8-methoxychromen-4-one; 2-(2-Hydroxy-6-methoxyphenyl)-5,7-dihydroxy-8-methoxy-4H-1-benzopyran-4-one; LMPK12111310; 5,7,2'-Trihydroxy-8,6'-dimethoxyflavone
HBIN011173	5,7,2'-trihydroxyflavone	5,7,2'-Trihydroxyflavone; FT-0641442; NCGC00017193-01; NCGC00017193-02; AC1NT15R; 5,7-Dihydroxy-2-(2-hydroxyphenyl)-4H-1-benzopyran-4-one; 5,7-dihydroxy-2-(2-hydroxyphenyl)chromen-4-one; CC-20956; C-25398; 4H-1-Benzopyran-4-one,5,7-dihydroxy-2-(2-hydroxyphenyl)-; TNP00057; MFCD00064915; DB-055717; CTK5D7283; 73046-40-9; DTXSID10223324; MCULE-4184729466; CHEMBL242385; OFYPDAKTVZXXPC-UHFFFAOYSA-N; …
HBIN011182	5,7,3',4'-tetrahydroxy-6,8-dimethoxy flavone	LMPK12111470; 5,7,3',4'-Tetrahydroxy-6,8-dimethoxyflavone; ZINC14437288; 3',4',5,7-Tetrahydroxy-6,8-dimethoxyflavone; 2-(3,4-dihydroxyphenyl)-5,7-dihydroxy-6,8-dimethoxy-4H-chromen-4-one; 2-(3,4-dihydroxyphenyl)-5,7-dihydroxy-6,8-dimethoxychromen-4-one; AC1NT0WM; 5,7,3',4'-Tetrahydroxy-6,8-dimethoxy flavone; MCULE-2890981242
HBIN011224	5,7,4'-trihydroxy-6-c-glucoside-8-c-arabinosideflavone	5,7,4'-trihydroxy-6-c-glucoside-8-c-arabinoside flavone
HBIN011225	5,7,4'-trihydroxy-6-methoxyflavanone	AC1NT16C; 5,7,4/'-Trihydroxy-6-methoxyflavanone; AK104440; 5,7-DIHYDROXY-2-(4-HYDROXYPHENYL)-6-METHOXY-2,3-DIHYDRO-1-BENZOPYRAN-4-ONE; 5,7-Dihydroxy-2-(4-hydroxyphenyl)-6-methoxychroman-4-one; AKOS022184707; 5,7-dihydroxy-2-(4-hydroxyphenyl)-6-methoxy-2,3-dihydrochromen-4-one; 5,7,4'-trihydroxy-6-methoxydihydroflavone; 6-Methoxynaringenin; 4CN-1869; 5,7-dihydroxy-2-(4-hydroxyphenyl)-6-methoxy-3,4…
HBIN011231	5,7,4'-trihydroxy-8-methoxyflavanone	AC1NT16C; 5,7,4/'-Trihydroxy-6-methoxyflavanone; AK104440; 5,7-DIHYDROXY-2-(4-HYDROXYPHENYL)-6-METHOXY-2,3-DIHYDRO-1-BENZOPYRAN-4-ONE; 5,7-Dihydroxy-2-(4-hydroxyphenyl)-6-methoxychroman-4-one; AKOS022184707; 5,7-dihydroxy-2-(4-hydroxyphenyl)-6-methoxy-2,3-dihydrochromen-4-one; 5,7,4'-trihydroxy-8-methoxydihydroflavone; 6-Methoxynaringenin; 4CN-1869; 5,7-dihydroxy-2-(4-hydroxyphenyl)-6-methoxy-3,4…
HBIN011233	5,7,4'-Trihydroxy-8-methoxyflavone	BG01592764; DTXSID80205713; AKOS028108779; SCHEMBL738981; CTK5A6274; 5,7-dihydroxy-2-(4-hydroxyphenyl)-8-methoxy-chromone; 4'-Hydroxywogonin; LMPK12111363; 5,7-dihydroxy-2-(4-hydroxyphenyl)-8-methoxychromen-4-one; CHEMBL245712; W1620; 5,7-dihydroxy-2-(4-hydroxyphenyl)-8-methoxy-4-chromenone; MolPort-035-705-972; 5,7-dihydroxy-2-(4-hydroxyphenyl)-8-methoxy-chromen-4-one; 4H-1-Benzopyran-4-one,5,7-…
HBIN011288	5,7-dihydroxy-6,8,2',3'-tetramethoxyflavone	AC1NSURA; 2-(2,3-dimethoxyphenyl)-5,7-dihydroxy-6,8-dimethoxychromen-4-one; 5,7-Dihydroxy-6,8,2',3'-tetramethoxyflavone
HBIN011330	5,8,2'-trihydroxy-6,7-dimethoxyflavone	77056-21-4; KB-291744; 5,8-dihydroxy-2-(2-hydroxyphenyl)-6,7-dimethoxychromen-4-one; DTXSID80227854; 5,8,2'-Trihydroxy-6,7-dimethoxyflavone; AC1Q46BA; 6,7-Dimethoxy-2',5,8-trihydroxyflavone; 4H-1-Benzopyran-4-one, 5,8-dihydroxy-2-(2-hydroxyphenyl)-6,7-dimethoxy-; LMPK12111424; AC1L4H6N; ZINC5998600
HBIN011331	5,8,2'-Trihydroxy-7-methoxyflavone	5,8-dihydroxy-2-(2-hydroxyphenyl)-7-methoxy-4-chromenone; 5,8-dihydroxy-2-(2-hydroxyphenyl)-7-methoxy-chromen-4-one; LMPK12111302; AC1L4H6K; 77056-20-3; 5,8,2'-trihydroxy-7-methoxyflavone; 5,8-dihydroxy-2-(2-hydroxyphenyl)-7-methoxychromen-4-one; DTXSID20227853; 4H-1-Benzopyran-4-one, 5,8-dihydroxy-2-(2-hydroxyphenyl)-7-methoxy-; 5,8-dihydroxy-2-(2-hydroxyphenyl)-7-methoxy-chromone
HBIN011342	5,8-Dihydroxy-6,7-dimethoxyflavone	LMPK12111431; 5,8-dihydroxy-6,7-dimethoxyflavone; SCHEMBL8160531; 5,8-dihydroxy-6,7-dimethoxy-2-phenyl-4-chromenone; 5,8-dihydroxy-6,7-dimethoxy-2-phenyl-chromone; AKOS030557619; 5,8-dihydroxy-6,7-dimethoxy-2-phenyl-chromen-4-one; 73202-52-5; 5,8-Dihydroxy-6,7-dimethoxy-2-phenyl-4H-chromen-4-one; 6,7-Dimethoxy-5,8-dihydroxy flavone; DTXSID20223451; CTK5D7548; AK588642; 5,8-dihydroxy-6,7-dimethoxy…
HBIN011612	5-hydroxy-4',7-dimethoxy-flavone	NA
HBIN011653	5-hydroxy-7,8-dimethoxyflavone	NA
HBIN011841	5-o-caffeoylquinic acid	(1R,3R,4S,5R)-3-[(2E)-3-(3,4-dihydroxyphenyl)prop-2-enoyloxy]-1,4,5-trihydroxycyclohexanecarboxylic acid; (1R,3R,4S,5R)-3-[(E)-3-(3,4-dihydroxyphenyl)prop-2-enoyl]oxy-1,4,5-trihydroxy-cyclohexane-1-carboxylic acid; 5-o-caffeoylquinic acid ; 5-Caffeylquinic acid; trans-5-O-caffeoyl-D-quinic acid; 5- O- caffeoylquinicacid; (1R,3R,4S,5R)-3-[(E)-3-(3,4-dihydroxyphenyl)prop-2-enoyl]oxy-1,4,5-trihydrox…
HBIN012285	6-c-arabinopyranosyl-8-c-glucopyranosyl-5,7-dihydroxyflavone	NA
HBIN012525	6-methoxygossypol	6-Methoxy-gossypol; 7-(8-formyl-1,6,7-trihydroxy-3-methyl-5-propan-2-yl-naphthalen-2-yl)-2,8-dihydroxy-3-methoxy-6-methyl-4-propan-2-yl-naphthalene-1-carbaldehyde; 7-(8-formyl-1,7-dihydroxy-5-isopropyl-6-methoxy-3-methyl-2-naphthyl)-2,3,8-trihydroxy-4-isopropyl-6-methyl-naphthalene-1-carbaldehyde; CTK1H3638; (2,2'-Binaphthalene)-8,8'-dicarboxaldehyde, 1,1',6,7,7'-pentahydroxy-6'-methoxy-3,3'-dime…
HBIN012667	6-O-E-Feruloylajugol	[(1S,4aR,7S,7aS)-7-hydroxy-7-methyl-1-[(2S,3R,4S,5S,6R)-3,4,5-trihydroxy-6-(hydroxymethyl)oxan-2-yl]oxy-4a,5,6,7a-tetrahydro-1H-cyclopenta[c]pyran-5-yl] (Z)-3-(4-hydroxy-3-methoxyphenyl)prop-2-enoate; 6-o-e-feruloylajugol; 6-O-E-feruloyl ajugol; AC1O3DAT
HBIN012891	7,2',6'-trihydroxy-5-methoxychalcone	(E)-1-(2,4-dihydroxy-6-methoxyphenyl)-3-(2,6-dihydroxyphenyl)prop-2-en-1-one; AC1NT0X4
HBIN012892	7,2',6'-trihydroxy-5-methoxyflavanone	AC1NT16F; 7,2',6'-Trihydroxy-5-methoxyflavanone; 2-(2,6-dihydroxyphenyl)-7-hydroxy-5-methoxy-2,3-dihydrochromen-4-one; LMPK12140122
HBIN012893	7,2'6'-trihydroxy-5-methoxyflavanone	AC1NT16F; 7,2',6'-Trihydroxy-5-methoxyflavanone; 2-(2,6-dihydroxyphenyl)-7-hydroxy-5-methoxy-2,3-dihydrochromen-4-one; LMPK12140122
HBIN012906	7,3',4'-Trihydroxyflavone	BRN 0253031; CHEMBL301624; AK112316; 4H-1-Benzopyran-4-one,2-(3,4-dihydroxyphenyl)-7-hydroxy-; 3',4',7-Trihydroxyflavone; LMPK12110042; DTXSID30175836; Q-100553; MolPort-004-955-148; 2-(3,4-Dihydroxy-phenyl)-7-hydroxy-chromen-4-one; trihydroxyflavone, 3',4',7-(rg); AJ-55730; 2-(3,4-dihydroxyphenyl)-7-hydroxy-4H-chromen-4-one; ZINC6092199; 5-18-04-00590 (Beilstein Handbook Reference); ZINC00057766…
HBIN013338	7-methoxybaicalein	NA
HBIN013681	8-c-arabinopyranosyl-6-c-glucopyranosyl-5,7-dihydroxyflavone	NA
HBIN013807	8-methoxy-5-o-glucoside flavone	8-methoxy-2-phenyl-5-[(2S,3R,4S,5S,6R)-3,4,5-trihydroxy-6-(hydroxymethyl)oxan-2-yl]oxychromen-4-one; AC1NSY3A
HBIN014077	9-Cedranone	9-cedranone
HBIN014294	acacetin	Linarigenin; KBio2_000595; AIDS014771; SPECTRUM200499; 480-44-4; Acaceztin; 4'-Methoxy-5,7-dihydroxyflavone; Akatsetin; A827453; KBio1_000878; 5,7-Dioxy-4'-methoxyflavone; Apigenin 4'-dimethyl ether; NSC76061; CHEBI:15335; Prestwick1_000695; Spectrum_000135; 5,7-dihydroxy-2-(4-methoxyphenyl)-4-chromenone; NINDS_000878; 00017_FLUKA; ZINC00005600; Acacetin; AIDS-014771; WLN: T66 BO EVJ CR DO1& GQ I…
HBIN015447	(-)-alpha-cedrene	(&#8722;)-alpha-Cedrene; 22133_FLUKA; [3R-(3alpha,3abeta,7beta,8aalpha)]-2,3,4,7,8,8a-hexahydro-3,6,8,8-tetramethyl-1H-3a,7-methanoazulene; STOCK1N-53148; (1S,2R,5S,7S)-2,6,6,8-tetramethyltricyclo[5.3.1.0(1,5)]undec-8-ene; (1S,2R,5S)-2,6,6,8-Tetramethyltricyclo[5.3.1.01.5]undec-8-ene; (-)-.alpha.-Cedrene; CHEBI:10216
HBIN015533	alpha-Guaiene	(1S,4S,7R)-1,4-dimethyl-7-prop-1-en-2-yl-1,2,3,4,5,6,7,8-octahydroazulene; alpha-guaiene; α-guaiene; (1S,4S,7R)-7-isopropenyl-1,4-dimethyl-1,2,3,4,5,6,7,8-octahydroazulene
HBIN015547	alpha-humulene	(1E,4E,8E)-2,6,6,9-tetramethyl-1,4,8-cycloundecatriene; 2,6,6,9-tetramethyl-cycloundeca-1,4,8-triene; 65907-25-7; 2,6,6,9-Tetramethyl-1,4,8-cycloundecatriene (E,E,E)-; 3,7,10-Humulatriene; 19132-75-3; UNII-54W56MD2WD; CHEMBL251280; alpha-Humulene, >=96.0% (GC); alpha-Humalene; .alpha.-Humulene; ZINC30726967; MFCD00042689; 53675_FLUKA; (E,E,E)-2,6,6,9-tetramethyl-1,4,8-cycloundecatriene; AKOS01596…
HBIN015646	alpha-phenylcinnamic acid nitrile	α-phenylcinnamicacidnitrile
HBIN016408	apigenin	520-36-5; Spectrum2_000428; 10798_FLUKA; Biochem Biophys Res Comm 212: 767 (1997); CCRIS 3789; AIDS001401; apigenin-7-olate; KBioGR_002565; KBio3_002887; BSPBio_000368; 5,7-dihydroxy-2-(4-hydroxyphenyl)chromen-4-one; HSCI1_000221; Flavone, 4',5,7-trihydroxy-; 4H-1-Benzopyran-4-one, 5,7-dihydroxy-2-(4-hydroxyphenyl)-; EINECS 208-292-3; A3145_SIGMA; 7-hydroxy-2-(4-hydroxyphenyl)-4-oxo-1-benzopyran-…
HBIN017475	Azulol	Azulene, 1,4-dimethyl-7-isopropyl-; Uroazulen; Spectrum4_000762; 1,4-Dimethyl-7-isopropylazulene (JAN); KBio1_001006; KBioGR_001144; Eucazulen; 3,8-Dimethyl-5-(2-propyl)azulene; Kessazulen; BSPBio_002954; NSC4714; 1,4-Dimethyl-7-(1-methylethyl)azulene; Guiazulene; ST5308207; Purazulen; Vetivazulen; WLN: L57J B1 F1 IY1&1; SPECTRUM1502249; Silazulon; KBioSS_001678; EINECS 207-701-2; 1,4-dimethyl-7-…
HBIN017508	baicalein	5,6,7-trihydroxyflavanone; KBio3_002435; NCGC00025282-03; 5,6,7-trihydroxy-2-phenyl-chromen-4-one; AIDS-000731; 5,6,7-trihydroxy-2-phenyl-4H-chromen-4-one; baicalein ; Sho-saiko-to; 5,6,7-trihydroxy-2-phenylchromen-4-one; ST057152; Spectrum_000427; SPECTRUM1504002; 5,6,7-trihydroxy-2-phenyl-chromone; KBio1_001798; KBio2_006043; NSC 661431; 11712_FLUKA; SDCCGMLS-0066744.P001; KBioSS_000907; CHEBI:…
HBIN017513	baicalein-7-o-β-d-glucopyranoside	NA
HBIN017516	baicalin	21967-41-9; STOCK1N-21299; (2S,3S,4S,5R,6S)-6-(5,6-dihydroxy-4-oxo-2-phenyl-chromen-7-yl)oxy-3,4,5-trihydroxy-oxane-2-carboxylic acid; (2S,3S,4S,5R,6S)-6-(5,6-dihydroxy-4-oxo-2-phenylchromen-7-yl)oxy-3,4,5-trihydroxyoxane-2-carboxylic acid; 5,6,7-Trihydroxyflavone-7-O-.beta.-D-glucopyranosideuronic acid; C10025; Baicalin; AIDS001402; 100647-26-5; 7-D-Glucuronic acid-5,6-dihydroxyflavone; 5,6-dihy…
HBIN018223	β-patchoulene	beta-patchoulene; β- patchoulene; [1S-(1alpha,4alpha,7alpha)]-1,2,3,4,5,6,7,8-octahydro-1,4,9,9-tetramethyl-4,7-methanoazulene
HBIN018263	β-selinene	ZINC8234293; (4aR,7R,8aS)-4a-methyl-1-methylidene-7-(prop-1-en-2-yl)decahydronaphthalene eudesma-4(14),11-diene; .beta.-Eudesmene; CHEBI:10443; YOVSPTNQHMDJAG-QLFBSQMISA-N; Eudesma-4(14),11-diene; (4aR,7R,8aS)-4a-methyl-1-methylidene-7-(prop-1-en-2-yl)decahydronaphthalene; (4aR,7R,8aS)-7-isopropenyl-4a-methyl-1-methylenedecahydronaphthalene; beta-selinene; CHEMBL2287242; beta-Selinene; eudesemene…
HBIN018278	beta-sitosterol	24.alpha.-Ethylcholesterol; alpha-Dihydrofucosterol; 83-46-5; MEGxp0_001710; SPBio_002950; 16-(5-ethyl-6-methyl-heptan-2-yl)-10,13-dimethyl-2,3,4,7,8,9,11,12,14,15,16,17-dodecahydro-1H-cyclopenta[a]phenanthren-3-ol; 16-(5-ethyl-6-methylheptan-2-yl)-10,13-dimethyl-2,3,4,7,8,9,11,12,14,15,16,17-dodecahydro-1H-cyclopenta[a]phenanthren-3-ol; 24beta-Ethylcholesterol; SKF 14463; Prestwick1_000985; (3S,…
HBIN018327	beta-skytanthine	beta-Skytanthine; CHEBI:10445; 24282-31-3; DTXSID90331875; C09987; AC1L9D2E; (4S,4aR,7S,7aS)-2,4,7-trimethyl-1,3,4,4a,5,6,7,7a-octahydrocyclopenta[c]pyridine
HBIN018535	biotin	NA
HBIN018557	bis[(2S)-2-ethylhexyl] benzene-1,2-dicarboxylate	benzene-1,2-dicarboxylic acid bis[(2S)-2-ethylhexyl] ester; ZINC03860433
HBIN018781	BOX	FEMA No. 2131; Benzenemethanoic acid; Retardex; Caswell No. 081; LS-280; Benzeneformic acid; benzoic acid; 1863-63-4 (AMMONIUM SALT); E 210; 65-85-0; 109479_SIAL; benzenecarboxylic acid; Benzoic acid (TN); NSC7918 (AMMONIUM SALT); AI3-03710; WLN: QVR; BEZ; 582-25-2 (POTASSIUM SALT); Kyselina benzoova; 33047_RIEDEL; C00180; Flowers of benzoin; HSDB 704; W213128_ALDRICH; ST5213864; nchembio.2007.22…
HBIN019200	BZQ	WLN: RVR; 427551_ALDRICH; NSC 8077; Ketone, diphenyl; .alpha.-Oxoditane; Mettler Toledo Calibration substance ME 18870, Benzophenone; alpha-Oxodiphenylmethane; alpha-Oxoditane; NSC8077; AIDS-017932; Benzene, benzoyl-; EINECS 204-337-6; 442842_SUPELCO; W213403_ALDRICH; Methanone, diphenyl-; AIDS017932; HSDB 6809; CCRIS 629; 239852_SIAL; NCGC00090787-04; di(phenyl)methanone; Diphenyl ketone; 73664_…
HBIN019475	campesterol	campesterol ; FT-0082089; Augelicincampesterol; (24R)-5-Ergosten-3; (1R,3AS,3BR,9AS,9BS,11AR)-1-[(2R,5R)-5,6-DIMETHYLHEPTAN-2-YL]-9A,11A-DIMETHYL-1H,2H,3H,3AH,3BH,4H,5H,5AH,6H,9H,9BH,10H,11H-CYCLOPENTA[A]PHENANTHREN-7-OL; A-ol; 24(R)-Ergost-5-en-3beta-ol; 24alpha-Methyl-5-cholesten-3beta-ol; AK307302; SC-66911; (8R,9S,10S,13R,14S,17R)-17-((2R,5R)-5,6-Dimethylheptan-2-yl)-10,13-dimethyl-4,5,6,7,8,…
HBIN019484	Campesteryl ferulate	campesteryl ferulate
HBIN019688	caprylic acid	Octanoic acid (mixed isomers); AK405365; octoic acid; Sodium octanoate, 96%; Natrium octanoat; D05220; NoO notEa AAENI; W279927_ALDRICH; Sodium caprylate [NF]; KB-80641; ACMC-1BO0W; MCULE-8227046407; AIDS-006110; Caprylsaeure; V0353; Octylic acid; Enantic acid; Caprylic acid sodium salt; Sodium n-octanoate; Sodium octoate; Octanoic acid sodium salt; 68937-74-6; MolPort-006-113-836; EINECS 273-085…
HBIN019775	carthamidin	SCHEMBL476289; LMPK12140618; Carthamidin; 5,6,7-trihydroxy-2-(4-hydroxyphenyl)-3,4-dihydro-2H-1-benzopyran-4-one; Ambotz529-53-3
HBIN019909	catalpol	Catalpol; LMPR01020108; beta-D-Glucopyranoside, 1a,1b,2,5a,6,6a-hexahydro-6-hydroxy-1a-(hydroxymethyl)oxireno(4,5)cyclopenta(1,2-c)pyran-2-yl, (1aS-(1aalpha,1bbeta,2beta,5abeta,6beta,6aalpha))-; 2415-24-9; Catalpinoside; NCGC00163523-01; beta-D-Glucopyranoside, 1a,1b,2,5a,6,6a-hexahydro-6-hydroxy- 1a-(hydroxymethyl)oxireno(4,5)cyclopenta(1,2-c)pyran-2-yl, (1aS-(1a-alpha,1b-beta,2-beta,5a-beta,6-b…
HBIN020447	chrysin	NCI60_003886; AIDS-001398; NCGC00094842-05; Spectrum5_001503; 5,7-dihydroxy-2-phenyl-chromen-4-one; 5,7-dihydroxy-2-phenyl-4H-chromen-4-one; CAS-480-40-0; AIDS001398; Spectrum3_001399; KBio3_002238; 5,7-dihydroxy-2-phenylchromen-4-one; 4H-1-Benzopyran-4-one, 5,7-dihydroxy-2-phenyl- (9CI); NCGC00094842-04; 5,7-dihydroxy-2-phenyl-4-chromenone; BPBio1_000746; SPBio_000766; 5-18-04-00076 (Beilstein H…
HBIN020457	chrysoeriol	4',5-dihydroxy-3'-methoxyflavon-7-olate(1-); 5,7, 4'-trihydroxy-3'-methoxyflavone; CHEBI:57799; 5-hydroxy-2-(4-hydroxy-3-methoxyphenyl)-4-oxo-4H-chromen-7-olate; 4',5-dihydroxy-3'-methoxyflavon-7-olate anion
HBIN021138	Clorius	AI3-00525; NSC 9394; InChI=1/C8H8O2/c1-10-8(9)7-5-3-2-4-6-7/h2-6H,1H; 18344_FLUKA; benzoic acid methyl ester; AIDS-018029; Oil of Niobe; UN2938; ZINC00156868; AIDS018029; Methyl benzoate; CCRIS 5851; EINECS 202-259-7; Methyl benzoate [UN2938] [Keep away from food]; Essence of niobe; WLN: 1OVR; Clorius (VAN); Methylester kyseliny benzoove [Czech]; oniobe oil; 93-58-3; W268305_ALDRICH; FEMA No. 268…
HBIN021430	coptisine	Y0053; BDBM50030257; C19H14NO4; UNII-0GCL71VN14; AK198733; HSDB 8323; CHEMBL362071; Coptisine sulfate; 6020-18-4 (chloride); DTXSID10188404; XYHOBCMEDLZUMP-UHFFFAOYSA-N; AC1Q701I; Coptisine; alkaloid; C16938; HY-N0430; N1737; Bis[1,3]benzodioxolo[5,6-a:4',5'-g]quinolizinium,6,7-dihydro-; 1198398-71-8; 0GCL71VN14; MEGxp0_001731; N2494; Q-100421; LS-44700; AC1L2HUS; KPT; CHEBI:67862; bis[methylened…
HBIN021590	Cosmetin	Apigenin-7-O-.beta.-D-glucopyranoside; 5-hydroxy-2-(4-hydroxyphenyl)-4-oxo-4H-chromen-7-yl beta-D-glucopyranoside; Apigenin 7-O-glucoside; BSPBio_002758; Apigenin-7-O-glucoside; Spectrum5_000562; 7-(beta-D-Glucopyranosyloxy)-5-hydroxy-2-(4-hydroxyphenyl)-4H-1-benzopyran-4-one; SpecPlus_000927; 7-(beta-D-glucopyranosyloxy)-5-hydroxy-2-(4-hydroxyphenyl)-4H-chromen-4-one; KBioSS_000656; Cosmosiin; 5…
HBIN022700	darendoside B	NA
HBIN022701	darendoside B_qt	NA
HBIN022815	DBP	NSC 6370; KBio2_002532; n-Butyl phthalate; RC Plasticizer DBP; dibutyl benzene-1,2-dicarboxylate; Dibutyl 1,2-benzenedicarboxylate; PX 104; Dibutyl-o-phthalate; EPA Pesticide Chemical Code 028001; Kodaflex DBP; Phthalic acid, dibutyl ester; NSC6370; 36736_RIEDEL; Polycizer DBP; ST5406580; Hatcol DBP; SpecPlus_000628; KBio2_005100; RCRA waste no. U069; EINECS 201-557-4; Dibutyl phthalate; Witcizer…
HBIN023512	DFA	WLN: RMR; EINECS 204-539-4; (phenylamino)benzene; Styrene, reaction product with diphenylamine; ZINC00967716; Oprea1_815288; Caswell No. 398; Diphenylamine, reaction product with 2,2,4-trimethylpentene; DIPHENYL-AMINE; Phenylaniline; Shield DPA; C6H5-NH-C6H5; Poly(diphenylamine); N-Fenylanilin [Czech]; AI3-00781; 33149_RIEDEL; Benzene, (phenylamino)-; CCRIS 4699; N-Phenylbenzenamine; Benzene, ani…
HBIN023816	Dihydrobaicalin	(2S)-5,6-Dihydroxy-7-(beta-D-glucurono pyranosyloxy)flavanone; dihydrobaicalin; BDBM50250625; CHEMBL467197
HBIN023817	Dihydrobaicalin_qt	NA
HBIN023945	DIHYDROOROXYLIN	5-hydroxy-6-methoxyflavanone-7-O-α-D-galactopyranoside_qt
HBIN023946	dihydrooroxylin A	NCGC00180735-02!5,7-dihydroxy-6-methoxy-2-phenyl-2,3-dihydrochromen-4-one; (S)-5,7-Dihydroxy-6-methoxy-2-phenylchroman-4-one; SMR000440557; CHEBI:67376; 5,7-Dihydroxy-6-methoxyflavanone; AC1NSUL5; NP-001206; 4H-1-Benzopyran-4-one, 2,3-dihydro-5,7-dihydroxy-6-methoxy-2-phenyl-, (S)-; HMS2268B15; MCULE-9660679251; Flavanone, 5,7-dihydroxy-6-methoxy-; Dihydrooroxylin; MolPort-001-740-631; 5,7-dihydr…
HBIN023952	dihydroperilla alcohol	(4-prop-1-en-2-ylcyclohexyl)methanol; AK658944; cis-p-Menth-8-en-7-ol; (Cis-4-(prop-1-en-2-yl)cyclohexyl)methanol; SCHEMBL10886649; Cyclohexanemethanol, 4-(1-methylethenyl)-, trans-; SCHEMBL3129182; CTK0J6379; AKOS030614335; GMYHXOPIKMGWOM-MGCOHNPYSA-N; cis-isopulegone; [4-(prop-1-en-2-yl)cyclohexyl]methanol; 22521-57-9; 4beta-Isopropenylcyclohexane-1beta-methanol; p-Menth-8-en-7-ol; GMYHXOPIKMGW…
HBIN024023	Diisobutyl succinate	butanedioic acid diisobutyl ester; 925-06-4; bis(2-methylpropyl) butanedioate; EINECS 213-113-7; Succinic acid, diisobutyl ester; succinic acid diisobutyl ester; Butanedioic acid, bis(2-methylpropyl) ester; AI3-05515; diisobutyl butanedioate
HBIN024112	Diop	HSDB 588; 1,2-Benzenedicarboxylic acid, diisooctyl ester; bis(6-methylheptyl) benzene-1,2-dicarboxylate; Diisocapryl phthalate; EINECS 248-523-5; Diisooctyl phthalate; 71097-28-4; Phthalic acid, bis(6-methylheptyl)ester; Phthalic acid, diisooctyl ester; AI3-27697-X (USDA); 27554-26-3; Diisooctyl 1,2-benzenedicarboxylate; 1330-91-2; NSC 6381; Di-iso-octyl phthalate; 41375-90-0; benzene-1,2-dicarbo…
HBIN024193	diosmin	520-27-4; C10039; 5-hydroxy-2-(3-hydroxy-4-methoxy-phenyl)-7-[(2S,3R,4S,5S,6R)-3,4,5-trihydroxy-6-[[(2R,3R,4R,5R,6S)-3,4,5-trihydroxy-6-methyl-tetrahydropyran-2-yl]oxymethyl]tetrahydropyran-2-yl]oxy-chromen-4-one; 4H-1-Benzopyran-4-one, 7-((6-O-(6-deoxy-.alpha.-L-mannopyranosyl)-.beta.- D-glucopyranosyl)oxy)-5-hydroxy-2-(3-hydroxy-4-methoxyphenyl)-; Diosmin [INN]; Diosmetin 7-O-rutinoside; AIDS05…
HBIN024252	d-isomenthone	EINECS 214-813-5; (2R,5R)-2-isopropyl-5-methyl-1-cyclohexanone; Cyclohexanone, 5-methyl-2-(1-methylethyl)-, (2R-cis)-; (2R,5R)-5-methyl-2-propan-2-yl-cyclohexan-1-one; (2R,5R)-2-isopropyl-5-methylcyclohexanone; 18309-28-9; 1196-31-2; (2R,5R)-2-isopropyl-5-methyl-cyclohexan-1-one; (2R-cis)-5-methyl-2-(1-methylethyl)cyclohexanone; ZINC03860577; (+)-Isomenthone; (1R,4R)-p-menthan-3-one; EINECS 242-1…
HBIN024390	Dodekan	BRN 1697175; NSC8714; CHEBI:28817; Dihexyl; Alkanes, C10-14; D221104_ALDRICH; WLN: 12H; 442671_SUPELCO; Bihexyl; 44010_FLUKA; LMFA11000004; Ba 51-090453; NCGC00166012-01; Alkanes, C12-14; EINECS 203-967-9; Norpar 13; CH3-[CH2]10-CH3; n-Dodecan [German]; InChI=1/C12H26/c1-3-5-7-9-11-12-10-8-6-4-2/h3-12H2,1-2H; 129813-67-8; C12-14 alkanes; Dodecane; HSDB 5133; CCRIS 661; Normal Paraffin M; Adakane …
HBIN024713	(e)-4-phenyl-3-buten-2-one	BWHOZHOGCMHOBV-UHFFFAOYSA-N; CJ-16027; (3E)-4-Phenylbut-3-en-2-one (Benzalacetone); W-109036; 2-Phenylvinyl methyl ketone; DSSTox_GSID_31626; A813340; Benzylidene acetone (natural); DSSTox_CID_11626; MolPort-004-288-302; t-PBO; 4-Phenyl-(E)-3-Buten-2-one; (E)-Benzylideneacetone; Benzalacetone, analytical standard; DSSTox_RID_78888; 3-Buten-2-one, 4-phenyl-, (3E)-; AKOS000119902; (E)-4-Phenyl-3-bu…
HBIN024930	EIC	L1376_SIGMA; FEMA No. 3380; (Z,Z)-9,12-Octadecadienoic acid; LINOLELAIDIC ACID; 2197-37-7; 62230_FLUKA; AIDS-110888; 8024-22-4; NSC 281243; cis-9,cis-12-Linoleic acid; 506-21-8; L1012_SIGMA; AIDS110888; W338001_ALDRICH; 80969-37-5; all-cis-9,12-Octadecadienoic acid; HSDB 5200; CCRIS 652; cis-delta9,12-Octadecadienoic acid; CHEBI:17351; 9,12-Octadecadienoic acid, (E,E)-; 9,12-Octadecadienoic acid,…
HBIN025185	ent-Epicatechin	AIDS026330; AIDS-026330; (2S,3S)-2-(3,4-dihydroxyphenyl)chroman-3,5,7-triol; (+)-Epicatechin; 35323-91-2; C09728; 2H-1-Benzopyran-3,5,7-triol, 2-(3,4-dihydroxyphenyl)-3,4-dihydro-, (2S-cis)-; ZINC00119978
HBIN025268	epiberberine	SMR000232286; AK199153; BDBM50986; 16,17-DIMETHOXY-5,7-DIOXA-1??-AZAPENTACYCLO[11.8.0.0_,__.0?,?.0_?,_?]HENICOSA-1(13),2,4(8),9,11,14(19),15,17-OCTAEN-1-YLIUM; SC-81909; ZINC6017816; CTK5C8375; FT-0688286; Epiberberine; DTXSID90218854; 16,17-DIMETHOXY-5,7-DIOXA-1??-AZAPENTACYCLO[11.8.0.0(3),(1)(1).0?,?.0(1)?,(1)?]HENICOSA-1(13),2,4(8),9,11,14(19),15,17-OCTAEN-1-YLIUM; MolPort-039-052-346; HMS3358…
HBIN025593	eriodictyol	Eriodictyol; (2S)-2-(3,4-dihydroxyphenyl)-5,7-dihydroxy-4-chromanone; 552-58-9; CHEBI:28412; (2S)-2-(3,4-dihydroxyphenyl)-5,7-dihydroxy-2,3-dihydro-4H-chromen-4-one; C05631; (S)-3',4',5,7-Tetrahydroxyflavanone; 74565_FLUKA; eriodictyol ; ERD; (2S)-2-(3,4-dihydroxyphenyl)-5,7-dihydroxychroman-4-one; ZINC00058117; (2S)-2-(3,4-dihydroxyphenyl)-5,7-dihydroxy-chroman-4-one
HBIN025594	eriodictyol-7,3-diglucoside	2-(3,4-Dihydroxyphenyl)-3-(beta-D-glucopyranosyloxy)-5-hydroxy-7-(beta-D-glucopyranosyloxy)-2,3-dihydro-4H-1-benzopyran-4-one; AC1NSV7H; 2-(3,4-dihydroxyphenyl)-5-hydroxy-3,7-bis[[(2S,3R,4S,5S,6R)-3,4,5-trihydroxy-6-(hydroxymethyl)oxan-2-yl]oxy]-2,3-dihydrochromen-4-one
HBIN025600	Eriodyctiol (flavanone)	(2R)-2-(3,4-dihydroxyphenyl)-5,7-dihydroxy-chroman-4-one; ZINC00058116; (2R)-2-(3,4-dihydroxyphenyl)-5,7-dihydroxy-4-chromanone; (2R)-2-(3,4-dihydroxyphenyl)-5,7-dihydroxychroman-4-one; 4049-38-1; NCI60_017216; NSC649412
HBIN025622	Erucic acid	cis-Delta(13)-docosenoic acid; EINECS 204-011-3; E3385_SIGMA; C08316; Z-13-Docosenoic acid; AI3-18180; delta13:14-Docosenoic acid; Hystrene 2290; 45629_FLUKA; 13Z-docosenoic acid; cis-erucic acid; (Z)-Docos-13-enoic acid; NCGC00166073-01; LMFA01030089; (Z)-13-docosenoic acid; 112-86-7; erucicacid; Prifac 2990; B8010_SIGMA; NSC 6814; HSDB 5015; cis-13-Docosenoic acid; erucic acid; 13-Docosenoic ac…
HBIN025624	ervadivaricatine a	NA
HBIN026067	eugenol	EINECS 202-589-1; D0O4QB; Eugenol, tested according to Ph.Eur.; SCHEMBL20361; NCGC00091449-08; Eugenol, primary pharmaceutical reference standard; 1,3,4-Eugenol; Spectrum4_001783; AIDS002235; EPA Pesticide Chemical Code 102701; NSC8895; Engenol; BC682398; MolPort-001-783-095; SBB012362; IDI1_000692; 2-Methoxy-4-(2-propen-1-yl)phenol; ACMC-1AOH6; Tox21_300105; BDBM50164168; BIDD:ER0696; Phenol, 2-…
HBIN026465	ferulic acid	(E)-3-(4-hydroxy-3-methoxyphenyl)prop-2-enoate; caffeic acid 3-methyl ether; ferulicacid; A803063; (E)-3-(4-Hydroxy-3-methoxyphenyl)-2-propenoate; CJ-00500; ZB002373; ferulate; CHEBI:29749; (2E)-3-(4-hydroxy-3-methoxyphenyl)prop-2-enoate; 3-Methoxy-4-hydroxy-trans-cinnamate; (E)-3-(3-methoxy-4-oxidanyl-phenyl)prop-2-enoate; Ferulic Acid; AC1NUT2L; ferulic acid
HBIN027159	gamma-sitosterol	(3S,8R,9R,10S,13R,14S,17R)-17-[(2R,5S)-5-ethyl-6-methylheptan-2-yl]-10,13-dimethyl-2,3,4,7,8,9,11,12,14,15,16,17-dodecahydro-1H-cyclopenta[a]phenanthren-3-ol; AC1LCSTV
HBIN027199	Ganhuangenin	2-(3,6-dihydroxy-2-methoxy-phenyl)-5,7-dihydroxy-8-methoxy-chromen-4-one; 92519-91-0; 4H-1-Benzopyran-4-one, 2-(3,6-dihydroxy-2-methoxyphenyl)-5,7-dihydroxy-8-methoxy-; ST077153; 5,7,2',5'-Tetrahydroxy-8,6'-dimethoxy flavone; 5,7,3',6'-Tetrahydroxy-8,2'-dimethoxyflavone; Sb 1; AIDS211317; AIDS-211317; 2',5,5',7-Tetrahydroxy-6',8-dimethoxyflavone; 2-(3,6-dihydroxy-2-methoxy-phenyl)-5,7-dihydroxy-8…
HBIN027568	Germacrene D	C16142; (1E,6E,8S)-8-isopropyl-1-methyl-5-methylenecyclodeca-1,6-diene; (1E,6E,8S)-8-isopropyl-1-methyl-5-methylene-cyclodeca-1,6-diene; germacrene-d; (-)-Germacrene D; (1E,6E,8S)-1-methyl-5-methylidene-8-propan-2-yl-cyclodeca-1,6-diene; germacrene d; Germacrene- D; GermacreneD; (1E,6E,8S)-1-methyl-5-methylidene-8-propan-2-ylcyclodeca-1,6-diene; nchembio.2007.29-comp4
HBIN028006	glucobrassicin	3-Indolylmethylglucosinolate; DNDNWOWHUWNBCK-LDADJPATSA-N; Glucobrassicin; indolylmethyl glucosinolate; 1-S-[(1E)-2-(1H-Indol-3-yl)-N-(sulfooxy)ethanimidoyl]-1-thiohexopyranose #; Glucobrassicine
HBIN028009	glucobrassicin-1-sulzonate	CHEBI:79365; sulfoglucobrassicin(1-); 1-S-[2-(1-sulfo-1H-indol-3-yl)-N-(sulfonatooxy)ethanimidoyl]-1-thio-beta-D-glucopyranose
HBIN028034	glucoraphanin	4-methylsulfinylbutyl glucosinolate; Glucorafanin; 4-(methylsulfinyl)butyl-glucosinolate; 4-(methylsulfinyl)butyl glucosinolate
HBIN028049	gluocsamin	NA
HBIN028119	glycerol sinapate	Glycerol trisinapate; AC1NSVZC; Glycerol tris[3-(4-hydroxy-3,5-dimethoxyphenyl)propenoate]; 1,3-bis({[(2E)-3-(4-hydroxy-3,5-dimethoxyphenyl)prop-2-enoyl]oxy})propan-2-yl (2E)-3-(4-hydroxy-3,5-dimethoxyphenyl)prop-2-enoate; Tri-O-sinapoylglycerol; 2,3-bis[[(E)-3-(4-hydroxy-3,5-dimethoxyphenyl)prop-2-enoyl]oxy]propyl (E)-3-(4-hydroxy-3,5-dimethoxyphenyl)prop-2-enoate
HBIN028125	glyceryl linolenate	NA
HBIN029037	Henicosane	EINECS 211-118-9; henicosane; n-heneicosane; 286052_ALDRICH; 629-94-7; 51523_FLUKA; AI3-36479; CHEBI:32931; HENEICOSANE; 51525_FLUKA; CH3-[CH2]19-CH3
HBIN029089	heptadecyloxirane	NA
HBIN029090	Heptadekan	C01816; ALD-N019202; InChI=1/C17H36/c1-3-5-7-9-11-13-15-17-16-14-12-10-8-6-4-2/h3-17H2,1-2H; BRN 1738898; CH3-[CH2]15-CH3; NSC 172782; 51578_FLUKA; NSC172782; CHEBI:16148; 442676_SUPELCO; 629-78-7; 128503_ALDRICH; n-Heptadecane; AI3-36898; Heptadecane; EINECS 211-108-4; LMFA11000003; ARONIS020486; 4-01-00-00548 (Beilstein Handbook Reference)
HBIN029268	hexadecanoic acid	hexadecanoicacid; AC1NS0IJ
HBIN029328	hexanoic acid	(C6-C12) Alkylcarboxylic acid; n-Hexoic acid; BRN 0773837; Hexanoyl DL-carnitine; AC1O52RE; hexanoicacid; 142-62-1; Hexanoic acid (natural); n-Hexanoic acid; CCRIS 1347; Hexacid 698; 153745_ALDRICH; Hexanoic acid; 13476-79-4; 8040-17-3; 51109-46-7; AI3-07701; WLN: QV5; VVPRQWTYSNDTEA-UHFFFAOYSA-N; 19455-00-6; (C5-C9) Monobasic acids; Pentylformic acid; Hexanoyl-d,l-carnitine; Capronic acid; Butyl…
HBIN029337	HEXATRIACONTANE	630-06-8; Hexatriacontane; 442680_SUPELCO; AI3-52389; NSC407536; EINECS 211-127-8; 2040-92-8; n-Hexatriacontane; H12552_ALDRICH; 52920_FLUKA; 52919_FLUKA; NSC 407536
HBIN029648	Hyacinthin	HY1; c0210; alpha-Tolyaldehyde; 1-Oxo-2-phenylethane; 107395_ALDRICH; Acetaldehyde, phenyl- (8CI); ZINC00895323; Phenylacetic aldehyde; alpha-Tolualdehyde; NSC406309; alpha-Toluic aldehyde; 2-phenylacetaldehyde; NSC 406309; CHEBI:16424; FEMA No. 2974; 122-78-1; Phenylacetaldehyde solution; .alpha.-Tolualdehyde; W287407_ALDRICH; PHENYLACETALDEHYDE; W287415_ALDRICH; Benzylcarboxaldehyde; .alpha.-To…
HBIN029840	Hypnon	1-Phenylethanone; InChI=1/C8H8O/c1-7(9)8-5-3-2-4-6-8/h2-6H,1H; C07113; Acetylbenzene; ZINC00896628; Ethanone, 1-phenyl-; Acetophenon; 00790_FLUKA; Ketone, methyl phenyl; WLN: 1VR; 442438_SUPELCO; Methyl phenyl ketone; Usaf ek-496; 42163_FLUKA; Ketone, methyl phenyl-; Benzoyl methide; AI3-00575; AIDS-017929; W200905_ALDRICH; FEMA Number 2009; RCRA waste number U004; FEMA No. 2009; Phenyl methyl ke…
HBIN030497	(+/-)-Isoborneol	ZINC00968099; (1R,2R,4R)-1,7,7-trimethyl-2-norbornanol; (1R,2R,4R)-1,7,7-trimethylnorbornan-2-ol; (1R,4R,6R)-1,7,7-trimethylbicyclo[2.2.1]heptan-6-ol; W215805_ALDRICH; I13901_ALDRICH
HBIN030927	Isomartynoside	AIDS112625; isomartynoside; AIDS-112625; .beta.-D-Glucopyranoside, 2-(4-hydroxy-3-methoxyphenyl)ethyl 3-O-(6-deoxy-.alpha.-L-mannopyranosyl)-6-O-[(2E)-3-(3-hydroxy-4-methoxyphenyl)-1-oxo-2-propenyl]-
HBIN031221	isoschaftoside	Apigenin 6-C-alpha-L-arabinopyranoside-8-C-beta-D-glucopyranoside; 5,7-dihydroxy-2-(4-hydroxyphenyl)-8-[(2S,3R,4R,5S,6R)-3,4,5-trihydroxy-6-methylol-tetrahydropyran-2-yl]-6-[(2S,3R,4S,5S)-3,4,5-trihydroxytetrahydropyran-2-yl]chromone; 4H-1-Benzopyran-4-one, 6-alpha-L-arabinopyranosyl-8-beta-D-glucopyranosyl-5,7-dihydroxy-2-(4-hydroxyphenyl)-; 52012-29-0; 5,7-dihydroxy-2-(4-hydroxyphenyl)-8-[(2S,3…
HBIN031230	isoscutellarein	DTXSID20415172; 5,7,8-trihydroxy-2-(4-hydroxyphenyl)-4H-chromen-4-one; CTK4I4833; 5,7,8-trihydroxy-2-(4-hydroxyphenyl)chromen-4-one; SCHEMBL476215; Isoscutellarein; 8-Hydroxyapigenin; 41440-05-5; AC1NQYUJ; CHEBI:6059; LMPK12111361; CHEMBL1093284; 4',5,7,8-Tetrahydroxyflavone; C10097
HBIN031237	isoscutellarein 8-o-beta-d-glucuronide	NA
HBIN031501	jatrorrizine	Jatrorrhizine, iodide; 2,9,10-trimethoxy-5,6-dihydroisoquinolino[2,1-b]isoquinolin-7-ium-3-ol iodide; iatrorrhizine; JATRORRHIZINE IODIDE; jatrorhizinc; CHEMBL1990190; NSC-93137; AC1NURFL; Q-100433; Ambap3621-38-3; 7,8,13,13alpha-Tetradehydro-3-hydroxy-2,9,10-trimethoxyberbinium; jatrorrhizine; 1168-00-9; KB-78657; NSC93137
HBIN033041	LFA	Icosane; 44818_FLUKA; CHEBI:43619; 112-95-8; 219274_ALDRICH; n-Eicosane; EINECS 204-018-1; InChI=1/C20H42/c1-3-5-7-9-11-13-15-17-19-20-18-16-14-12-10-8-6-4-2/h3-20H2,1-2H; AI3-28404; EICOSANE; 44820_FLUKA; 442673_SUPELCO; CCRIS 663; NCIOpen2_003284; NSC62789; CH3-[CH2]18-CH3; NSC 62789
HBIN033341	Linolenic acid methyl ester	Methyl 9,12,15-octadecatrienoate; (9E,12E,15E)-octadeca-9,12,15-trienoic acid methyl ester; 9,12,15-Octadecatrienoic acid, methyl ester; NCI60_004707; methyl octadeca-9,12,15-trienoate; NSC607759; 7361-80-0; methyl (9E,12E,15E)-octadeca-9,12,15-trienoate; octadeca-9,12,15-trienoic acid methyl ester
HBIN033440	l-Menthone	KBio2_006915; CHEBI:15410; EINECS 237-926-1; Spectrum2_000691; 14073-97-3; KBio1_001477; LMPR01020019; (2S,5R)-5-methyl-2-propan-2-ylcyclohexan-1-one; trans-p-Menthan-3-one; (&#8722;)-Menthone; InChI=1/C10H18O/c1-7(2)9-5-4-8(3)6-10(9)11/h7-9H,4-6H2,1-3H3/t8-,9+/m1/s; (-)-5-Methyl-2-(1-methylethyl)cyclohexanone; (2S,5R)-5-methyl-2-(1-methylethyl)cyclohexanone; KBio3_002364; 218235_ALDRICH; Spectru…
HBIN033516	longipinene	tricyclo[5.4.0.0(2,8)]undec-9-ene,2,6,6,9-tetramethyl-; alpha-Longipinene
HBIN034647	MEHQ	1-Hydroxy-4-methoxybenzene; p-Guaiacol; Novo-Dermoquinona; EINECS 205-769-8; WLN: QR DO1; Mequinol [DCF:INN]; p-Methoxyphenol; Leucobasal; 4-Hydroxyphenol, polymer-bound; Hydroquinone monomethyl ether; PHENOL,4-METHOXY; Phenol, 4-methoxy-; Mono methyl ether hydroquinone; 4-Methoxyphenol; Mequinol (USAN); InChI=1/C7H8O2/c1-9-7-4-2-6(8)3-5-7/h2-5,8H,1H; M18655_ALDRICH; HQMME; Mequinol; CCRIS 5531; …
HBIN035073	Methyl 9-oxononanoate	1931-63-1; Nonanoic acid, 9-oxo-, methyl ester; Methyl 8-formyloctanoate; AI3-25458; Methyl azelaaldehydate; NSC53771; Azelaaldehydic acid, methyl ester; 9-ketopelargonic acid methyl ester; Methyl azelaaldehydrate; 9-Oxononanoic acid methyl ester
HBIN035102	methyl behenate	UNII-04KBO9R771; B1241; Kemester 9022; Docosanoic acid, methylester; Methyl docosanoate; BEHENIC ACID, METHYL ESTER; NSC 158426; DTXSID6029206; C23H46O2; MFCD00009347; NSC158426; C-24775; C444918B-ABDE-4650-8507-DA7E3AAC54EB; paragraph signthornE(R) paragraph signthornEa(1/4)xo yen; KS-00000YGJ; docosanoic acid methyl ester; HSDB 2724; CTK3J1975; AI3-36456; behenic acid methyl ester; Docosanoic a…
HBIN035201	methyl (E)-octadec-2-enoate	Methyl (2E)-2-octadecenoate; (E)-octadec-2-enoic acid methyl ester; 27234-05-5; 2-Octadecenoic acid, methyl ester
HBIN035252	methyl henicosanoate	6064-90-0; 51535_FLUKA; EINECS 227-994-0; METHYL HENEICOSANOATE; Methyl henicosaneate; H3265_SIGMA; Heneicosanoic acid, methyl ester; Heneicosanoic acid methyl ester; henicosanoic acid methyl ester
HBIN035262	METHYL HEXACOSANOATE	52203_FLUKA; hexacosanoic acid methyl ester; EINECS 227-355-6; 5802-82-4; cerotic acid methyl ester; H6389_SIGMA; Hexacosanoic acid, methyl ester
HBIN035271	methyl icos-11-enoate	2390-09-2; 11-Eicosenoic acid, methyl ester; methyl (E)-icos-11-enoate; Methyl (11E)-11-icosenoate; icos-11-enoic acid methyl ester; (E)-icos-11-enoic acid methyl ester; Methyl cis-icos-11-enoate; EINECS 219-226-8; Methyl 11-eicosenoate
HBIN035273	Methyl icosanoate	METHYL EICOSANOATE; 10941_FLUKA; icosanoic acid methyl ester; Eicosanoic acid, methyl ester; A3881_SIGMA; Methyl arachidate; arachidic acid methyl ester; Methyl arachisate; EINECS 214-304-8; AI3-36455; 1120-28-1; Arachidic acid methylester
HBIN035277	Methyl isoheptadecanoate	XIGHSXXUOBTIJH-UHFFFAOYSA-N; SCHEMBL4087075; 15-Methylpalmitic acid methyl ester; ethyl 15-methylhexadecanoate; methyl 15-methylhexadecanoate; Hexadecanoic acid, 15-methyl-, methyl ester; M6656_SIGMA; Methyl 15-methylpalmitate; AC1NSVAX; Ethyl 15-methyl-hexadecanoate; 15-Methylhexadecanoic acid methyl ester
HBIN035292	Methyl laurate	61689_FLUKA; NSC 5027; W271500_ALDRICH; Methyl dodecanoate; AI3-00669; HSDB 5550; Methyl dodecylate; AIDS-212985; Stepan C40; FEMA No. 2715; Uniphat A40; Methyl laurinate; Dodecanoic acid, methyl ester; NCGC00164095-01; Lauric acid methyl ester; Methyl n-dodecanoate; NSC5027; 111-82-0; AIDS212985; methyl laurate; BRN 1767780; FEMA number 2715; Metholene 2296; EINECS 203-911-3; dodecanoic acid met…
HBIN035295	Methyl lignocerate	lignoceric acid methyl ester; tetracosanoic acid methyl ester; EINECS 219-475-2; Methyl tetracosanoate; 2442-49-1; Methyl tetracosanoic acid; L6766_SIGMA; Tetracosanoic acid, methyl ester; 87115_FLUKA; Methyl Lignocerate
HBIN035297	Methyl linolelaidate	9,12-Octadecadienoic acid, methyl ester, (E,E)-; 9,12-OCTADECADIENOIC ACID (Z,Z)-, METHYL ESTER, HYDROPEROXIDE; 62155_FLUKA; EINECS 219-901-7; Methyl (9E,12E)-9,12-octadecadienoate; 9,12-Octadecadienoic acid (9Z,12Z)-, methyl ester, hydroperoxide; 11068-03-4; 2462-85-3; Methyl octadeca-9,12-dienoate; Methyl linoleate hydroperoxide; Methyl (9E,12E)-octadeca-9,12-dienoate; EINECS 219-560-4; AI3-364…
HBIN035309	Methyl margarate	AI3-36453; 286087_ALDRICH; 51633_FLUKA; 1731-92-6; H4515_SIGMA; Heptadecanoic acid, methyl ester; Margaric acid methyl ester; METHYL HEPTADECANOATE; EINECS 217-055-3; heptadecanoic acid methyl ester; NSC97364; NSC 97364
HBIN035312	methyl mercaptan	NSC-68072; SCHEMBL11319151; NSC68072
HBIN035315	Methyl montanate	octacosanoic acid methyl ester; Octacosanoic acid, methyl ester; METHYL OCTACOSANOATE; ZKHOYAKAFALNQD-UHFFFAOYSA-N; Methyl octacosanoate, analytical standard; methyl montanate; I14-19169; Octacosanoic acid,methyl ester; UNII-82S906Z1UB; Montanic acid, methyl ester; montanic acid methyl ester; 74701_FLUKA; AKOS015903301; Octacosanoic acid methyl ester (FAME MIX); C-48195; EINECS 259-754-6; 82S906Z…
HBIN035316	Methyl myristate	RG9851783C; AX8139517; SBB058686; ZINC36431114; Methyl myristate, >=98%, FG; myristic acid methyl; Uniphat A50; 124-10-7; NSC 5029; STL453780; tetradecanoic acid methyl ester; ZAZKJZBWRNNLDS-UHFFFAOYSA-N; DSSTox_CID_7019; Acide myristique methyl ester; NSC-5029; Metholeneat 2495; WE(1:0/14:0); S0310; FT-0686716; CHEBI:89199; Emery 2214; Methyl myristate, certified reference material, TraceCERT(R)…
HBIN035329	methyl nonadecanoate	Nonadecanoic acid methylester; 6583AF; MFCD00009011; 67FQ8VV2L3; AI3-36454; EINECS 217-056-9; RTR-007644; C-28213; UNII-67FQ8VV2L3; 74208_FLUKA; Methyl nonadecanoate, >=98% (GC); DTXSID40169524; CHEBI:87758; CTK3J1974; E(R)(3/4)AIeEa(1/4)xo yen; A25CCD7A-EA11-4124-B88C-A168A5582F47; TR-007644; Methyl nonadecan-1-oate; MolPort-003-938-831; ZINC86046710; nonadecanoic acid methyl ester; Nonadecanoic…
HBIN035340	Methyl octylate	Methyl caprylate; 21719_FLUKA; AI3-01979; 260673_ALDRICH; Octanoic acid, methyl ester; Caprylic acid methyl ester; 111-11-5; NSC3710; 4-02-00-00986 (Beilstein Handbook Reference); HSDB 5544; EINECS 203-835-0; Octanoic acid methyl ester; BRN 1752270; Methyl octanoate; NCGC00163978-01; NSC 3710; FEMA No. 2728; W272809_ALDRICH; Uniphat A20; Methyl caprylate (natural); Methyl n-octanoate
HBIN035353	methyl palmitate	AN-22050; AX8129465; Ethyl palmitate, >=99%; 76159_FLUKA; NSC 4197; XIRNKXNNONJFQO-UHFFFAOYSA-N; MCULE-8045613210; Ethyl hexadecanoate (ethyl palmitate); Methyl n-hexadecanoate; ZX-AT010664; Methyl hexadecanate; HSDB 5570; DSSTox_RID_82388; Uniphat A60; C-28203; QSPL 205; EINECS 211-064-6; AI3-03509; AKOS004910397; methylpalmitate; UNII-IRD3M534ZM; KSC489Q3H; HEXADECANOIC ACID,ETHYL ESTER MFC18 H…
HBIN035354	Methyl palmitelaidate	Methyl trans-9-hexadecenoate; (E)-9-Hexadecenoic acid, methyl ester; 76117_FLUKA; 10030-74-7; 9-Hexadecenoic acid, (E), methyl ester; (E)-hexadec-9-enoic acid methyl ester; P0203_SIGMA; Palmitelaidic acid methyl ester; hexadec-9-enoic acid methyl ester; methyl hexadec-9-enoate; methyl (E)-hexadec-9-enoate
HBIN035423	Methyl stearate	Ethyl stearate, analytical standard; NSC9418; Kemester 9018; MFCD00009006; Ethyl stearate, >=97%; SCHEMBL24287; Ethyl stearate, >=99% (capillary GC); octadecanoic acid ethyl ester; RTR-002287; TR-002287; Ethyl stearate, Vetec(TM) reagent grade, 97%; FEMA No. 3490; Methyl n-octadecanoate; n-Octadecanoic acid methyl ester; Metholene 2218; UNII-C64RTC734W; ACMC-1C2UL; 85769_FLUKA; methyl stearate; Q…
HBIN035450	Methyl tricosanoate	91478_FLUKA; 2433-97-8; T9900_SIGMA; EINECS 219-420-2; Tricosanoic acid, methyl ester; tricosanoic acid methyl ester
HBIN035468	Methyl (Z)-cinnamate	Methyl cinnamate, (Z); (Z)-3-phenylacrylic acid methyl ester; methyl (Z)-3-phenylprop-2-enoate; (Z)-3-phenylprop-2-enoic acid methyl ester
HBIN035573	Mipax	benzene-1,2-dicarboxylic acid dimethyl ester; Phthalic acid, dimethyl ester; BENZENE,1,2-DICARBOXYLIC ACID,DIMETHYL ESTER (PHTHALIC ACID,DIMETHYL ESTER); NSC 15398; Dimethyl benzeneorthodicarboxylate; AI3-00262; RCRA waste number U102; Repeftal; ZINC00391885; 525081_ALDRICH; Unimoll DM; Dimethyl 1,2-benzenedicarboxylate; Dimethyl phthalate [BSI:ISO]; ST5406382; Solvanom; HSDB 1641; Solvarone; 644…
HBIN035601	m-methoxybenzaldehyde	m-Anisaldehyde, purum, >=97.0% (GC); I01-4009; ZINC1676373; ANW-33168; STK397887; Metamethoxybenzaldehyde; 3-Anisaldehyde; DSSTox_RID_80235; AS02843; SBB040264; m-anis-aldehyde; Benzaldehyde, 3-methoxy-; m-Anisaldehyde, 97%; 3-Methoxy benzaldehyde; CS-W007346; CJ-27391; ACMC-1B21O; A832179; 3-(methyloxy)benzaldehyde; EINECS 209-712-8; PubChem13614; DSSTox_CID_24447; AZ0001-0362; 3-methyoxybenzald…
HBIN035804	Moslosooflavone	5-hydroxy-7,8-dimethoxy-2-phenyl-4-chromenone; 5-Hydroxy-7,8-dimethoxyflavone; 4H-1-Benzopyran-4-one, 5-hydroxy-7,8-dimethoxy-2-phenyl-; 3570-62-5; 5-hydroxy-7,8-dimethoxy-2-phenyl-chromone; ACon1_000806; 5-hydroxy-7,8-dimethoxy-2-phenyl-chromen-4-one; 5-hydroxy-7,8-dimethoxy-2-phenylchromen-4-one
HBIN036159	myristic acid	1-Tridecanecarboxylic acid; Myristinsaeure; CH3-[CH2]12-COOH; 70079_FLUKA; AI3-15381; LMFA01010014; CH3-[CH2]12-COO(-); NCGC00091068-02; Myristic acid-[9,10-3H]; C06424; Emery 655; myristic acid ; NSC 5028; 70082_FLUKA; C14 fatty acid; ST023797; W276405_ALDRICH; CCRIS 4724; Kortacid 1499; 3uev; TUNFSRHWOTWDNC-UHFFFAOYSA-M; Tetradecanoic acid; EINECS 250-924-5; n-Tetradecoic acid; 4-02-00-01126 (B…
HBIN036197	MYS	CH3-[CH2]13-CH3; 76509_FLUKA; 442700_SUPELCO; P3406_ALDRICH; 629-62-9; ghl.PD_Mitscher_leg0.43; EINECS 211-098-1; NCGC00164185-01; C08388; Pentadekan; 4-01-00-00529 (Beilstein Handbook Reference); n-Pentadecane; 76510_FLUKA; NSC 172781; CHEBI:28897; BRN 1698194; LMFA11000006; Pentadecane; HSDB 5729; NSC172781
HBIN036559	NEOBAICALEIN	NA
HBIN037045	nitidine	I14-18057; CHEMBL176008; 6872-57-7; 933301178Z; NCI60_000995; CTK5C8373; CHEBI:7578; FT-0686666; ZINC898732; SCHEMBL8014101; C09595; AK608233; 2,3-Dimethoxy-12-methyl-9H-phenanthridino[4',3'-2,1]benzo[4,5-d]1,3-dioxolane; N2626; 16,17-DIMETHOXY-21-METHYL-5,7-DIOXA-21-AZAPENTACYCLO[11.8.0.0(2),(1)?.0?,?.0(1)?,(1)?]HENICOSA-1(13),2(10),3,8,11,14(19),15,17,20-NONAEN-21-IUM; Nitidine; Nitidine chlori…
HBIN037254	nonanoic acid	bmse000499; Nonansaeure; Emery 1203; EC 203-931-2; Nonanoic Acid Anion; AC1L1QE7; AC1Q5W5X; NCGC00259975-01; FT-0660055; WLN: QV8; Emfac 1202; Fatty acids, C8-10; Pelargonsaeure; Hexacid C-9; RTR-002359; AC1Q2VX7; IioA inverted question markuEa; n-Nonylic acid; Z1258948135; pergonate; NCIOpen2_002882; 14047-60-0 (hydrochloride salt); Nonoic acid; ANW-16380; AKOS000118981; InChI=1/C9H18O2/c1-2-3-4…
HBIN037407	Norwogonin	70U0WT21IB; AKOS027381297; ST50309217; 5,7,8-trihydroxy-2-phenyl-chromone; 2-Phenyl-5,7,8-trihydroxy-4H-1-benzopyran-4-one; 5,7,8-Trihydroxy-2-phenyl-4H-chromen-4-one; LS-69047; 4H-1-Benzopyran-4-one, 2-phenyl-5,7,8-trihydroxy-; UNII-70U0WT21IB; CHEBI:7642; 4H-1-Benzopyran-4-one, 2-phenyl-5,7,8-trihydroxy- (9CI); ZINC5934539; 4443/9/8; SCHEMBL760431; AC1NQYVA; MCULE-7196250903; 5,7,8-trihydroxy-2…
HBIN037415	nothosmyrnol	Benzene, 1-(E)-(1-propenyl)-2,4-dimethoxy; 1-(1-Propenyl)-2,4-dimethoxybenzene; 829-39-0; AC1NSQI7; 2,4-dimethoxy-1-prop-1-enylbenzene; 1-(2,5-dimethoxy)phenyl-1-propene; 2,4-dimethoxy-1-[(E)-prop-1-enyl]benzene; 2,4-Dimethoxy-1-(1-propenyl)benzene; Benzene, 2,4-dimethoxy-1-(1-propenyl)-; SCHEMBL12090696; ghl.PD_Mitscher_leg0.56; SKWTXGMULLCOGN-SNAWJCMRSA-N
HBIN037715	OCT	HSDB 108; Oktan; CH3-[CH2]6-CH3; Normal octane; Octane, all isomers; InChI=1/C8H18/c1-3-5-7-8-6-4-2/h3-8H2,1-2H; NSC 9822; Oktanen; MG8; 74820_FLUKA; Ottani [Italian]; 111-65-9; Oktanen [Dutch]; c0044; 412236_ALDRICH; Oktan [Polish]; 74830_FLUKA; EINECS 203-892-1; octane; 50985-84-7; 31372-91-5; AI3-28789; 442698_SUPELCO; n-Oktan; 657042_ALDRICH; 296988_ALDRICH; n-octane; Octane Fraction; Ottani;…
HBIN038301	Oroxindin	(2S,3S,4S,5R,6S)-3,4,5-trihydroxy-6-(5-hydroxy-8-methoxy-4-oxo-2-phenyl-chromen-7-yl)oxy-tetrahydropyran-2-carboxylic acid; oroxindin; (2S,3S,4S,5R,6S)-3,4,5-trihydroxy-6-[(5-hydroxy-8-methoxy-4-oxo-2-phenyl-7-chromenyl)oxy]-2-tetrahydropyrancarboxylic acid; (2S,3S,4S,5R,6S)-3,4,5-trihydroxy-6-(5-hydroxy-8-methoxy-4-oxo-2-phenyl-chromen-7-yl)oxy-oxane-2-carboxylic acid; (2S,3S,4S,5R,6S)-3,4,5-tri…
HBIN038303	oroxylin a	5,7-dihydroxy-6-methoxy-2-phenyl-4H-chromen-4-one; CTK1D7949; ZINC5998558; Oroxylin A; CHEMBL183513; 5,7-Dihydroxy-6-methoxy-2-phenyl-chromen-4-one; SC-69298; NP-005013; HY-N0560; oroxylina; MolPort-019-937-219; 5,7-dihydroxy-6-methoxy-2-phenyl-4H-1-benzopyran-4-one; AKOS015903364; 5,7-dihydroxy-6-methoxy-2-phenyl-chromone; Oroxylin-A; MFCD02259441; AIDS089021; 5,7-dihydroxy-6-methoxy-2-phenyl-4-…
HBIN038304	oroxylin a 7-o-glucuronide	NA
HBIN038372	osladin	NA
HBIN038680	palmitic acid	HSDB 5001; FEMA No. 2832; Lunac P 95; WLN: QV15; Prifac 2960; Emersol 140; 76119_FLUKA; 4-02-00-01157 (Beilstein Handbook Reference); LS-2331; Pentadecanecarboxylic acid; Loxiol EP 278; Palmitic acid (7CI,8CI); P0500_SIGMA; n-Hexadecanoic acid; Palmitinsaeure; NCGC00164358-01; Hystrene 9016; Hexadecylic acid; Hexadecanoic acid; Hydrofol Acid 1690; 116860-99-2; hexadecoic acid; P5585_SIGMA; Hystre…
HBIN038764	Panicolin	5,2'-Dihydroxy-7,8-dimethoxyflavone; Ambap41060-16-6; ZINC2392262; 4H-1-Benzopyran-4-one, 5-hydroxy-2-(2-hydroxyphenyl)-7,8-dimethoxy-; MolPort-035-706-534; SKULLCAPFLAVONEI; 2',5-Dihydroxy-7,8-dimethoxyflavone; 5-hydroxy-2-(2-hydroxyphenyl)-7,8-dimethoxychromen-4-one; 41060-16-6; W2788; 5-hydroxy-2-(2-hydroxyphenyl)-7,8-dimethoxy-chromone; 5-hydroxy-2-(2-hydroxyphenyl)-7,8-dimethoxy-chromen-4-on…
HBIN038766	Paniculatin	SCHEMBL4742129; paniculatin; LMPK12050162
HBIN038995	p-coumaric acid	CHEBI:32373; Para-Coumaric acid; ZB001183; trans-4-Hydroxycinnamic acid; (E)-3-(4-Hydroxyphenyl)-2-propenoic acid; 2-propenoic acid, 3-(4-hydroxyphenyl)-, (2E)-; Naringeninic acid; p-Cumaric acid; CHEBI:36090; p-Coumaric acid,trans; 501-98-4; (E)-3-(4-hydroxyphenyl)acrylic acid; trans-4-coumarate; 4'-Hydroxycinnamic acid; 4-(2-Carboxyethenyl)phenolate; HC4; trans-4-hydroxycinnamate; trans-p-Couma…
HBIN039070	PEL	Benzyl carbinol; C05853; 2-PEA; BRN 1905732; Phenylethyl alcohol; PHENYLETHYL, B- ALCOHOL; Methanol, benzyl-; Benzylmethanol; W285803_ALDRICH; NSC 406252; W285811_ALDRICH; EINECS 200-456-2; Ethanol, phenyl-; Phenyl ethyl alcohol; EPA Pesticide Chemical Code 001503; 2-PHENYL-ETHANOL; Ethanol, 2-phenyl-; 4-06-00-03067 (Beilstein Handbook Reference); AI3-00744; D00192; 1-Phenyl-2-ethanol; .beta.-PEA…
HBIN039505	phenylbutanone-glucoside	NA
HBIN041273	pulegone	(5R)-5-methyl-2-(propan-2-ylidene)cyclohexan-1-one; 1beta-p-menth-4(8)-en-3-one; (5R)-5-methyl-2-propan-2-ylidenecyclohexan-1-one; (R)-p-Menth-4(8)-en-3-one; C09893; ST5307579; (+)-Pulegone; W296309_ALDRICH; (5R)-2-isopropylidene-5-methylcyclohexanone; ZINC02018602; (R)-2-Isopropylidene-5-methylcyclohexanone; (R)-()-Pulegone; (5R)-5-methyl-2-propan-2-ylidene-cyclohexan-1-one; P55708_ALDRICH; CHEB…
HBIN041943	raphanin	SCHEMBL2937706; UNII-NCO9MC39IO; 4-Isothiocyanato-1-(methylsulfinyl)-1-butene; MolPort-006-822-573; 4-Methylsulfinyl-3-butenyl-isothiocyanat (Sulphoraphen); L-SULFORAPHENE; 1-Butene, 4-isothiocyanato-1-(methylsulfinyl)-; 592-95-0; LS-86429; GRE-ITC; CHEMBL49659; ISOTHIOCYANIC ACID, 4-(METHYLSULFINYL)-3-BUTENYL ESTER; AC1O5FSI; Sulforaphene; NCO9MC39IO; Raphanin; 592S950; 4-methylsulfinylbut-3-eny…
HBIN042335	rivularin	5,2'-dihydroxy-7,8,6'-trimethoxyflavone
HBIN042339	(R)-linalool	Spectrum5_000393; KBioGR_002294; KBio2_003260; KBio2_000692; (3R)-3,7-dimethylocta-1,6-dien-3-ol; W263516_ALDRICH; ZINC01529820; Spectrum4_001777; C11388; 126-91-0; KBio3_002285; KBio2_005828; KBioSS_000692; 62139_FLUKA; (-)-Linalool; (R)-(&#8722;)-3,7-Dimethyl-1,6-octadien-3-ol; LMPR01020077; (-)-3,7-dimethyl-1,6-octadien-3-ol; (3R)-Linalool; CHEBI:28; SpecPlus_000909; KBio1_001949; NCGC00095658…
HBIN042854	salidroside	10338-51-9; (2R,3S,4S,5R,6R)-2-(hydroxymethyl)-6-[2-(4-hydroxyphenyl)ethoxy]oxane-3,4,5-triol; SCHEMBL17580247; (2R,3R,4S,5S,6R)-2-[2-(4-hydroxyphenyl)ethoxy]-6-methylol-tetrahydropyran-3,4,5-triol; ACon1_000366; 2-(4-Hydroxyphenyl)ethyl beta-D-glucopyranoside; Glucopyranoside, p-hydroxyphenethyl; Rhodosin; (2R,3S,4S,5R,6R)-2-(hydroxymethyl)-6-[2-(4-hydroxyphenyl)ethoxy]tetrahydropyran-3,4,5-trio…
HBIN042917	Salvigenin	BG01616899; DTXSID90172629; 19103-54-9; 5-Hydroxy-6,7-dimethoxy-2-(4-methoxyphenyl)-4H-chromen-4-one; 5-Hydroxy-6,7,4'-trimethoxyflavone; BDBM50092613; LMPK12111166; 4CN-1814; flavone, 5-hydroxy-4',6,7-trimethoxy-; AKOS032948589; ZINC2561268; 5-Hydroxy-6,7-dimethoxy-2-(4-methoxyphenyl)-4H-1-benzopyran-4-one; 7-O-methylpectolinarigenin; 4H-1-Benzopyran-4-one,5-hydroxy-6,7-dimethoxy-2-(4-methoxyphe…
HBIN043288	(S)-camphor	ZINC00967521; (1S,4S)-1,7,7-trimethyl-2-norbornanone; (1S)-1,7,7-trimethylbicyclo[2.2.1]heptan-2-one; (1S)-(-)-camphor; (1S,4S)-1,7,7-trimethylbicyclo[2.2.1]heptan-2-one; (1S)-(&#8722;)-Camphor; 279676_ALDRICH; (&#8722;)-Camphor; C352_ALDRICH; (1S,4S)-1,7,7-trimethylnorbornan-2-one; CHEBI:15397; 21293_FLUKA
HBIN043527	scutellarein	ZINC00899075; AC-11200; ST50331621; 5,6,7-trihydroxy-2-(4-hydroxyphenyl)-4H-chromen-4-one; Isocarthamidin; AN-45602; MFCD00017692; 5,6,7-trihydroxy-2-(4-hydroxyphenyl)chromone; 6-Hydroxyapigenin; N2093; P460GTI853; 5,6,7,4'-Tetrahydroxyflavone; 4',5,6,7-Tetrahydroxyflavanone; AK198746; 6-Hydroxyapigenin;4,5,6,7-Tetrahydroxyflavone; C10184; 529-53-3; AC1NQYX1; Scutellarein, >=98% (HPLC); AKOS01596…
HBIN043533	scutellarin	(2S,3S,4S,5R,6S)-6-[[5,6-dihydroxy-2-(4-hydroxyphenyl)-4-oxo-7-chromenyl]oxy]-3,4,5-trihydroxy-2-tetrahydropyrancarboxylic acid; CHEBI:61284; 676536-34-8; 1329-06-2; 4H-1-Benzopyran-4-one, 7-(.beta.-D-glucopyranuronosyloxy)-5,6-dihydroxy-2-(4-hydroxyphenyl)-; Flavone, 4',5,6,7-tetrahydroxy-, 7-beta-D-glucopyranuronoside; scutellarin(1-); scutellarein 7-O-beta-D-glucuronate; Scutellarein-7beta-D-g…
HBIN043536	Scutevulin	80713-32-2; 2',5,7-Trihydroxy-8-methoxyflavone; SCHEMBL5162875; 5,7-dihydroxy-2-(2-hydroxyphenyl)-8-methoxy-chromen-4-one; scutevulin; CHEMBL2235250; 5,7-dihydroxy-2-(2-hydroxyphenyl)-8-methoxy-4-chromenone; 5,7,2'-trihydroxy-8-methoxyflavone; 5,7-dihydroxy-2-(2-hydroxyphenyl)-8-methoxychromen-4-one; LMPK12111303; AC1NT0AX; 5,7-dihydroxy-2-(2-hydroxyphenyl)-8-methoxy-chromone
HBIN043548	sebacicacid	AC1MI2Z2; EINECS 256-186-0; ACM45037670; sebacic acid; 45037-67-0; DTXSID50196366; Sebacaldehyde; decanedial; CTK1D8105; SCHEMBL453083
HBIN044058	sinalbine	NA
HBIN044060	Sinapaldehyde	(E)-3-(4-hydroxy-3,5-dimethoxyphenyl)-2-propenal; 3-(4-hydroxy-3,5-dimethoxyphenyl)prop-2-enal; 3-(4-hydroxy-3,5-dimethoxy-phenyl)prop-2-enal; 4206-58-0; (2E)-3-(4-hydroxy-3,5-dimethoxyphenyl)prop-2-enal; 3,5-Dimethoxy-4-hydroxycinnamaldehyde; sinapaldehyde; 3-(4-hydroxy-3,5-dimethoxy-phenyl)acrolein; 3,5-Dimethoxy-4-hydroxycinnamaldehyde (E); (E)-3-(4-hydroxy-3,5-dimethoxy-phenyl)prop-2-enal; ME…
HBIN044064	sinapine	18696-26-9; AK676101; ZINC1532786; C00933; Ethanaminium, 2-((3-(4-hydroxy-3,5-dimethoxyphenyl)-1-oxo-2-propenyl)oxy)-N,N,N-trimethyl-; 2-((3-(4-Hydroxy-3,5-dimethoxyphenyl)-1-oxo-2-propenyl)oxy)-N,N,N-trimethylethanaminium; AC1Q65Q4; Sinapine bisulphate; sinapic acid choline ester; 09211A0HHL; ACon1_000255; 2-[(2E)-3-(4-hydroxy-3,5-dimethoxyphenyl)prop-2-enoyloxy]-N,N,N-trimethylethanaminium; UNI…
HBIN044065	sinapine bisulfate	NA
HBIN044152	Sitogluside	(2R,3R,4S,5S,6R)-2-[[(3S,8S,9S,10R,13R,14S,17R)-17-[(2R,5R)-5-ethyl-6-methyl-heptan-2-yl]-10,13-dimethyl-2,3,4,7,8,9,11,12,14,15,16,17-dodecahydro-1H-cyclopenta[a]phenanthren-3-yl]oxy]-6-(hydroxymethyl)oxane-3,4,5-triol; (2R,3R,4S,5S,6R)-2-[[(3S,8S,9S,10R,13R,14S,17R)-17-[(1R,4R)-4-ethyl-1,5-dimethyl-hexyl]-10,13-dimethyl-2,3,4,7,8,9,11,12,14,15,16,17-dodecahydro-1H-cyclopenta[a]phenanthren-3-yl]…
HBIN044158	sitosterol	stigmasta-5-en-3-ol; Steroids, hydroxy; .beta.-Sitosterin; BETA-SITOSTEROL; Sobatum; NCGC00142598-02; BG01125081; Stigmasterol,23-dihydro-; a-Phytosterol; I06-1624; Prestwick1_000985; 24-alpha-Ethylcholesterol; BDBM50218197; Azuprostat; beta-Phytosterol; beta-Sitosterol, synthetic, >=95%; D0Y7LD; BBC/449; alexandrin_qt; SC-19725; delta5-Stigmasten-3-beta-ol; Prestwick3_000985; AC-24183; alpha-Dih…
HBIN044187	skullcapflavone i	5,2'-Dihydroxy-7,8-dimethoxyflavone; Ambap41060-16-6; ZINC2392262; 4H-1-Benzopyran-4-one, 5-hydroxy-2-(2-hydroxyphenyl)-7,8-dimethoxy-; MolPort-035-706-534; SKULLCAPFLAVONEI; 2',5-Dihydroxy-7,8-dimethoxyflavone; 5-hydroxy-2-(2-hydroxyphenyl)-7,8-dimethoxychromen-4-one; 41060-16-6; W2788; Panicolin; LMPK12111304; AKOS032961992; Skullcapflavone I; 8P86A8Q1G0; Skullcapflavone I, analytical standard;…
HBIN044192	Skullcapflavone II	CHEBI:9061; SCHEMBL3960981; 4H-1-Benzopyran-4-one, 5-hydroxy-2-(2-hydroxy-6-methoxyphenyl)-6,7,8-trimethoxy-; Skullcapflavon II; AC1L3Y1Y; NSC717846; skullcapflavone ii; MolPort-019-937-105; ZINC899074; AC1Q6AIS; DTXSID10203606; 5-hydroxy-2-(2-hydroxy-6-methoxy-phenyl)-6,7,8-trimethoxy-chromone; Neobaicalein; 5,2'-Dihydroxy-6,7,8,6'-tetramethoxyflavone; C10183; NP-016391; 5-hydroxy-2-(2-hydroxy-6…
HBIN044199	(S)-Matsutake alcohol	ZINC02026960; (S)-1-Octen-3-ol; (S)-oct-1-en-3-ol; (3S)-oct-1-en-3-ol; CHEBI:46735; 3OL; 40577_FLUKA
HBIN044204	s-methyl mercapto-l-cysteine	NA
HBIN044730	stearic acid	4-02-00-01206 (Beilstein Handbook Reference); AIDS-049230; Emersol 871; 8039-52-9; 126539-56-8; stearic acid, ion(1-); D00119; octadecoic acid; Hydrofol Acid 150 (VAN); 134503-33-6; Fatty acids C16-18; 68937-76-8; Kam 2000; VLZ 200; Lunac S 98; Glycon S-80; Hy-phi 1205; Lunac YA; Pristerene 9429; Pristerene 4900; Octadecanoic acid (9CI); Hystrene 9718NF; Edenor FHTI; Cetylacetic acid; NAA 173; NS…
HBIN044918	stigmasterol	(3beta,22E)-Stigmasta-5,22-dien-3-ol; (3S,8S,9S,10R,13R,14S,17R)-17-[(1R,4S)-4-ethyl-1,5-dimethyl-hex-2-enyl]-10,13-dimethyl-2,3,4,7,8,9,11,12,14,15,16,17-dodecahydro-1H-cyclopenta[a]phenanthren-3-ol; stigmasta-5,22E-dien-3beta-ol; 24-Ethyl-5,22-cholestadien-3beta-ol; (24S)-Stigmast-5,22-dien-3beta-ol; Stigmasterin; Stigmasta-5,22-dien-3-ol, (3beta,22E)- (9CI); (24S)-5,22-Stigmastadien-3beta-ol; …
HBIN044939	Stigmasterol-beta-D-glucoside	stigmasterol-beta-d-glucoside; stigmasterol-β-d-glucoside
HBIN045073	sucrose	Amerfand; 29253-78-9; Sucrose (TN); alpha-D-Glucopyranoside, beta-D-fructofuranosyl-; saccharose; Sugar, compressible (NF); S0389_SIGMA; D06530; C00089; 1-alpha-D-Glucopyranosyl-2-beta-D-fructofuranoside; Sucrose, purified; 8027-47-2; 30027-72-6; 29764-06-5; 86101-30-6; NSC 406942; D06529; Sucrose [USAN:JAN]; 146187-04-4; ST5308554; Sugar, confectioner's; D(+)-Saccharose; S7903_SIGMA; GLC-(1-2)FR…
HBIN045092	suffruticoside a	Suffruticoside A
HBIN045154	Supraene	trans-Squalene; SQUALENE; 94016-35-0; 2,6,10,14,18,22-Tetracosahexaene, 2,6,10,15,19,23-hexamethyl-; (E,E,E,E)-Squalene; InChI=1/C30H50/c1-25(2)15-11-19-29(7)23-13-21-27(5)17-9-10-18-28(6)22-14-24-30(8)20-12-16-26(3)4/h15-18,23-24H,9-14,19-22H2,1-8H3/b27-17+,28-18+,29-23+,30-24; 442785_SUPELCO; Squalene, Spinacene, Supraene; AIDS-017396; 2,6,10,15,19,23-Hexamethyltetracosa-2,6,10,14,18,22-hexaene…
HBIN045261	(+)-Syringaresinol	(+ )-syringaresinol; 4-[(1S,3aR,4S,6aR)-4-(4-hydroxy-3,5-dimethoxy-phenyl)-1,3,3a,4,6,6a-hexahydrofuro[4,3-c]furan-1-yl]-2,6-dimethoxy-phenol; 21453-69-0; C10889; (7alpha,7'alpha,8alpha,8'alpha)-3,3',5,5'-tetramethoxy-7,9':7',9-diepoxylignane-4,4'-diol; CHEBI:47; 4-[(1S,3aR,4S,6aR)-4-(4-hydroxy-3,5-dimethoxyphenyl)-1,3,3a,4,6,6a-hexahydrofuro[4,3-c]furan-1-yl]-2,6-dimethoxyphenol; (+)-syringaresi…
HBIN045809	TBP	Tributylfosfat [Czech]; WLN: 4OPO & O4 & O4; Butyl phosphate, ((BuO)3PO); HSDB 1678; MCS 2495; NCGC00091588-01; tributoxy-hydroxyphosphanium; AI3-00399; Celluphos 4; tributoxy-hydroxy-phosphonium; 19824-61-4; tributoxy-hydroxy-phosphanium; Butyl phosphate; Tributilfosfato; InChI=1/C12H27O4P/c1-4-7-10-14-17(13,15-11-8-5-2)16-12-9-6-3/h4-12H2,1-3H; 90818_FLUKA; C14439; Tributylphosphat [German]; Tr…
HBIN046103	tetramethylpyrazine	NSC46451; AS-16022; 126400-81-5; Ligustrazine; R879; SMR000059042; Ligustrazine HCl; UNII-7YYD00RL0S; AB0018386; AN-8078; ligustrazine; AC1L4GOB; AC-907/25014219; 2,3,5,6-Tetramethylpyrazine (natural); 87396-75-6; BS factor; 76494-51-4; CHEMBL1939729; TMPZ; EINECS 214-391-2; MLS000069594; 183938_ALDRICH; 93615-56-6; 2,3,5,6-Tetramethyl pyrazine; NSC 36080; Pyrazine, 2,3,5,6-tetramethyl-, hydrochl…
HBIN046122	TETRATETRACONTANE	88143_FLUKA; n-Tetratetracontane; 442709_SUPELCO; 48598_SUPELCO; NSC 102262; Tetratetracontane; NSC102262; 7098-22-8; 88144_FLUKA; 358746_ALDRICH; EINECS 230-407-0; AI3-36493
HBIN046867	TRD	LMFA11000001; Tridekan; InChI=1/C13H28/c1-3-5-7-9-11-13-12-10-8-6-4-2/h3-13H2,1-2H; CH3-[CH2]11-CH3; 629-50-5; 91490_FLUKA; 442713_SUPELCO; HSDB 5727; n-Tridecane; EINECS 211-093-4; NSC66205; T57401_ALDRICH; Tridecane; CHEBI:35998; NSC 66205; TRIDECANE, N-; C13834
HBIN047452	Tyrosol	NSC 59876; 4-Hydroxybenzeneethanol; P-HYDROXYPHENETHYL ALCOHOL; NSC59876; tyrosol; 56105_FLUKA; Benzeneethanol, 4-hydroxy-; 2-(4-Hydroxyphenyl)ethanol; 4-Hydroxyphenethyl alcohol; 2-(P-HYDROXYPHENYL)ETHANOL; ZINC00164581; SB 01196; 4-(2-hydroxyethyl)phenol; InChI=1/C8H10O2/c9-6-5-7-1-3-8(10)4-2-7/h1-4,9-10H,5-6H; EINECS 207-930-8; 4-Hydroxyphenylethanol; CHEBI:1879; 501-94-0; 188255_ALDRICH; 7905…
HBIN047522	UND	UN2330; NSC 66159; HSDB 5791; CH3-[CH2]9-CH3; EINECS 214-300-6; 1120-21-4; 61193-21-3; NSC66159; Undekan; AI3-21126; Hendecane; CHEBI:46342; CCRIS 3796; n-Undecane; U407_ALDRICH; 442714_SUPELCO; Undecane [UN2330] [Flammable liquid]; W510505_ALDRICH; BRN 1697099; 94000_FLUKA; 4-01-00-00487 (Beilstein Handbook Reference); Undecane; InChI=1/C11H24/c1-3-5-7-9-11-10-8-6-4-2/h3-11H2,1-2H; Hendekan
HBIN047528	undecanal	Undecylic aldehyde; U592; n-Undecanal; 2-Undecenal, (2E)-; ZINC1849946; C11 aldehyde; Undecanone, alpha-; AN-20835; KB-176726; FNP3S9MG30; (2E)-undec-2-enal; Undecanal; Undecyl aldehyde; 2463-77-6; U0046; Hendecanaldehyde; Undec-2(E)-enal; trans-2-Undecenal, >=95%, FG; NSC22578; trans-2-Undecen-1-al; UNII-F851M0LYFD component PANBRUWVURLWGY-MDZDMXLPSA-N; n-Undecyl aldehyde; A817413; W309206_ALDRI…
HBIN048012	Viscidulin III	NA
HBIN048014	viscidulin iii-6'-o-β-d-glucopyranoside	NA
HBIN048368	WLN: VHR	InChI=1/C7H6O/c8-6-7-4-2-1-3-5-7/h1-6; CHEBI:17169; Benzene methylal; B1334_ALDRICH; Ald3-H_000012; Benzenecarbonal; Benzaldehyde (natural); NCGC00091819-01; AI3-09931; EINECS 202-860-4; Oil of Bitter Almond; ST5213372; Artificial essential oil of almond; nchembio814-comp15; LS-27; EPA Pesticide Chemical Code 008601; BENZALDEHYDE; W212709_ALDRICH; Ald3.1-H_000160; D02314; Benzenemethylal; NCI-C56…
HBIN048372	wogonin	CTK5B8471; AIDS-001403; CCG-208499; ZB015158; 5,7-dihydroxy-8-methoxyflavone; ZINC899093; 5,7-dihydroxy-8-methoxy-2-phenyl-chromone; BG01576594; AN-46964; 632-85-9; V1530; MCULE-9854289767; 5,7-dihydroxy-8-methoxy-2-phenyl-4-chromenone; Vogonin; AIDS001403; NSC717845; SC-25044; 10-29-7; AC1NQYXJ; 5,7-Dihydroxy-8-methoxy-2-phenyl-chromen-4-one(Wogonin); NCGC00247464-01; IN1943; ZINC111327191; BN07…
HBIN048373	wogonin 5-β-d-glucoside	NA
HBIN048376	wogonoside	wogoninoglucuronide; N2501; wogonoside ; (2S,3S,4S,5R)-2,3,4,5-tetrahydroxy-5-(5-hydroxy-8-methoxy-4-oxo-2-phenylchromen-7-yl)-6-oxohexanoic acid; AC-20339; ZINC21992923; Y0212; BG01748878; AKOS015965557
HBIN048377	woodorien	A-d-glucopyranosyloxy)-4-hydroxybenzoate; Woodorien; 155112-92-8; Benzoic acid, 3-(beta-D-glucopyranosyloxy)-4-hydroxy-, methyl ester; AC1L4URU; AC1Q5ZJK; methyl 3-(; Methyl 3-(beta-D-glucopyranosyloxy)-4-hydroxybenzoate; METHYL 4-HYDROXY-3-{[(2S,3R,4S,5S,6R)-3,4,5-TRIHYDROXY-6-(HYDROXYMETHYL)OXAN-2-YL]OXY}BENZOATE; methyl 4-hydroxy-3-[(2S,3R,4S,5S,6R)-3,4,5-trihydroxy-6-(hydroxymethyl)oxan-2-yl]…
